# Supplementary material for: Transcriptome Analysis of Synaptoneurosomes Identifies Neuroplasticity Genes Overexpressed in Incipient Alzheimer's Disease
Source: PLOS journal article supplement (doi:10.1371/journal.pone.0004936), 2009-03-18

A

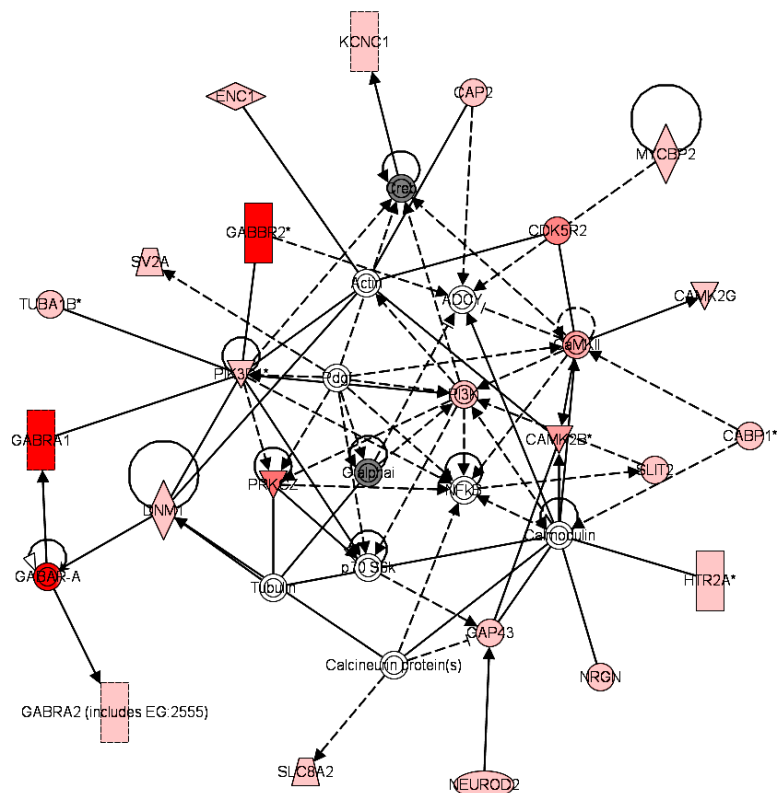

Key

## Relationships

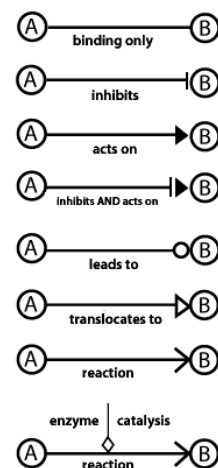

Note: "Acts on" and "inhibits" edges may also include a binding event.

© 2000-2008 Ingenuity Systems, Inc. All rights reserved.

B

## Network 4: Nervous System development and Function

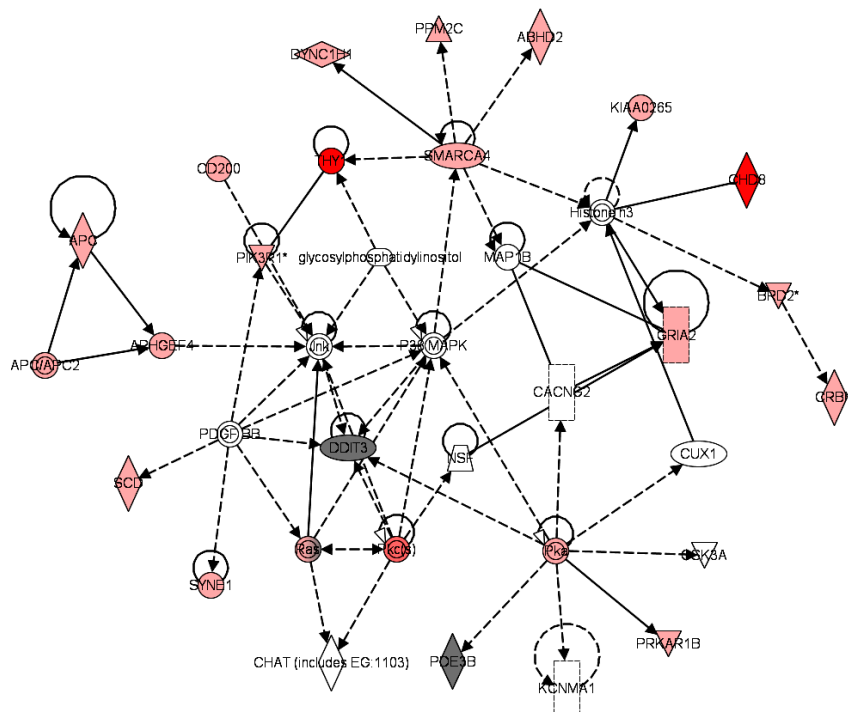

## Network Shapes

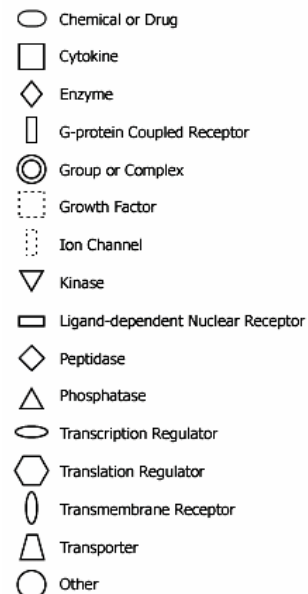

© 2000-2008 Ingenuity Systems, Inc. All rights reserved.

C

Network 4: GluR2 and Interactors

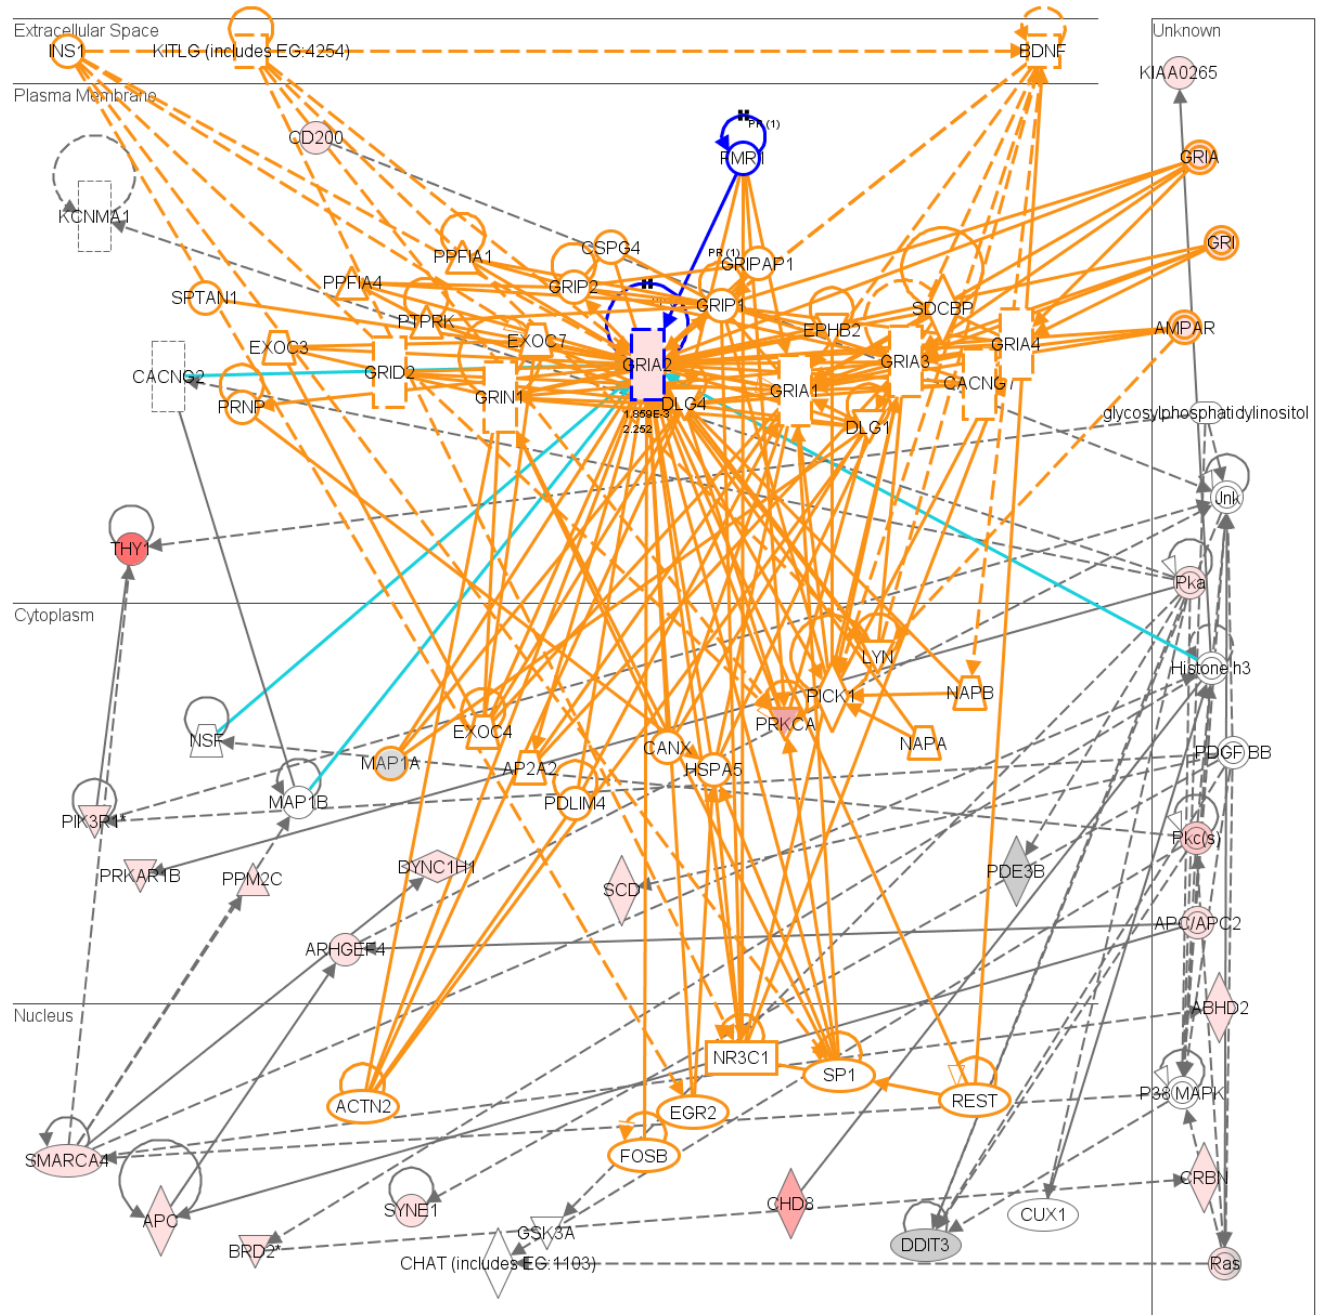

Supplement: S10 (10.1371/journal.pone.0004936.s010) [file journal.pone.0004936.s010]
