# Supplementary material for: Transcriptome Analysis of Synaptoneurosomes Identifies Neuroplasticity Genes Overexpressed in Incipient Alzheimer's Disease
Source: PLoS One. 2009 Mar 19;4(3):e4936. doi: 10.1371/journal.pone.0004936 (PMC2654156; doi:10.1371/journal.pone.0004936)
Supplement: Table S3 — Ingenuity Functional Analysis. Genes comprising the two most significant categories, Cell-to-Cell Signaling and Interactions and Nervous System Function and Development. (0.04 MB XLS) [file pone.0004936.s004.xls]

## Sheet: Nerv sys funct&dev
Name	Description	Gene ID	Affymetrix	p-value	Fold Change	Networks	Location	Type
CHRM3	cholinergic receptor, muscarinic 3	1131	214596_at	0.005	2.315	2	Plasma Membrane	G-protein coupled receptor
GRIA2	glutamate receptor, ionotropic, AMPA 2	2891	205358_at	0.002	2.252	4	Plasma Membrane	ion channel
NRGN	neurogranin (protein kinase C substrate, RC3)	4900	204081_at	0.002	1.924	3	Cytoplasm	other
SLC1A2	solute carrier family 1 (glial high affinity glutamate transporter), member 2	6506	208389_s_at	0.01	1.908	5	Plasma Membrane	transporter
EPHA4	EPH receptor A4	2043	206114_at	0.003	1.854	2	Plasma Membrane	kinase
KCNC1	potassium voltage-gated channel, Shaw-related subfamily, member 1	3746	208477_at	0.006	1.813	3	Plasma Membrane	ion channel
THY1	Thy-1 cell surface antigen	7070	208850_s_at	0	1.761	4	Plasma Membrane	other
HOMER1	homer homolog 1 (Drosophila)	9456	213793_s_at	0.001	1.746	1	Plasma Membrane	other
ENC1	ectodermal-neural cortex (with BTB-like domain)	8507	201340_s_at	0.008	1.735	3	Nucleus	peptidase
NRXN1	neurexin 1	9378	209914_s_at	0	1.728	10	Plasma Membrane	transporter
APC	adenomatous polyposis coli	324	216933_x_at	0.009	1.684	4	Nucleus	enzyme
GABBR2	gamma-aminobutyric acid (GABA) B receptor, 2	9568	211679_x_at	0	1.631	3	Plasma Membrane	G-protein coupled receptor
KRAS	v-Ki-ras2 Kirsten rat sarcoma viral oncogene homolog	3845	214352_s_at	0.005	1.614	1	Cytoplasm	enzyme
NTRK3	neurotrophic tyrosine kinase, receptor, type 3	4916	215311_at	0.003	1.571	2	Plasma Membrane	kinase
LPPR4	plasticity related gene 1	9890	213496_at	0.006	1.534	5	Plasma Membrane	phosphatase
APOE	apolipoprotein E	348	203381_s_at	0.01	1.516	2	Extracellular Space	transporter
CAMK2G	calcium/calmodulin-dependent protein kinase (CaM kinase) II gamma	818	212669_at	0.001	1.497	3	Cytoplasm	kinase
STMN2	stathmin-like 2	11075	203001_s_at	0.004	1.494	2	Cytoplasm	other
SV2A	synaptic vesicle glycoprotein 2A	9900	203069_at	0.009	1.489	3	Cytoplasm	transporter
GAP43	growth associated protein 43	2596	216963_s_at	0.001	1.478	3	Plasma Membrane	other
SCN1B	sodium channel, voltage-gated, type I, beta	6324	205508_at	0.009	1.467	2	Plasma Membrane	ion channel
ARNT2	aryl-hydrocarbon receptor nuclear translocator 2	9915	202986_at	0.002	1.462	1	Nucleus	transcription regulator
PRKCZ	protein kinase C, zeta	5590	202178_at	0	1.447	3,6	Cytoplasm	kinase
BAIAP2	BAI1-associated protein 2	10458	205293_x_at	0.006	1.426	2	Plasma Membrane	kinase
KIF1A	kinesin family member 1A	547	203849_s_at	0.01	1.422	12	Cytoplasm	other
HTR2A	5-hydroxytryptamine (serotonin) receptor 2A	3356	207135_at	0.002	1.415	3	Plasma Membrane	G-protein coupled receptor
PRKAR1B	protein kinase, cAMP-dependent, regulatory, type I, beta	5575	212559_at	0.004	1.383	4	Cytoplasm	kinase
AP2M1	adaptor-related protein complex 2, mu 1 subunit	1173	200613_at	0.006	1.364	13	Cytoplasm	transporter
SIPA1L1	signal-induced proliferation-associated 1 like 1	26037	202255_s_at	0.003	1.363	10	Cytoplasm	other
PRKACA	protein kinase, cAMP-dependent, catalytic, alpha	5566	202801_at	0.003	1.361	2	Cytoplasm	kinase
GABRA1	gamma-aminobutyric acid (GABA) A receptor, alpha 1	2554	206678_at	0	1.359	3	Plasma Membrane	ion channel
M-RIP	myosin phosphatase-Rho interacting protein	23164	214771_x_at	0.001	1.357	1	Cytoplasm	other
SYNGR1	synaptogyrin 1	9145	204287_at	0.001	1.351		Plasma Membrane	transporter
DNM1	dynamin 1	1759	215116_s_at	0.006	1.344	3	Cytoplasm	enzyme
LMO4	LIM domain only 4	8543	209204_at	0.006	1.344	5	Nucleus	transcription regulator
SNCB	synuclein, beta	6620	207853_s_at	0.004	1.318	2	Cytoplasm	other
CD200	CD200 molecule	4345	209582_s_at	0.006	1.311	4	Plasma Membrane	other
MAPK8IP3	mitogen-activated protein kinase 8 interacting protein 3	23162	213178_s_at	0.009	1.301	1	Cytoplasm	other
HNT	neurotrimin	50863	222020_s_at	0.002	1.298	11	Plasma Membrane	other
PTPRD	protein tyrosine phosphatase, receptor type, D	5789	213362_at	0.002	1.296	8	Plasma Membrane	phosphatase
PKM2	pyruvate kinase, muscle	5315	201251_at	0.006	1.295	9	Cytoplasm	kinase
NRXN2	neurexin 2	9379	209983_s_at	0.002	1.285	10	Plasma Membrane	transporter
SLIT2	slit homolog 2 (Drosophila)	9353	209897_s_at	0.001	1.268	3	Extracellular Space	other
CDK5R2	cyclin-dependent kinase 5, regulatory subunit 2 (p39)	8941	205852_at	0	1.26	3	Nucleus	other
MAPK3	mitogen-activated protein kinase 3	5595	212046_x_at	0.003	1.249	2	Cytoplasm	kinase
NEUROD2	neurogenic differentiation 2	4761	210271_at	0.008	1.24	3	Nucleus	transcription regulator
TRIO	triple functional domain (PTPRF interacting)	7204	209013_x_at	0.009	1.234	2	Plasma Membrane	kinase
RUSC1	RUN and SH3 domain containing 1	23623	206949_s_at	0.002	1.229	9	Nucleus	other
ELAVL4	ELAV (embryonic lethal, abnormal vision, Drosophila)-like 4 (Hu antigen D)	1996	206051_at	0.003	1.219	1	Cytoplasm	other
OPCML	opioid binding protein/cell adhesion molecule-like	4978	206215_at	0.002	1.214	11	Plasma Membrane	transmembrane receptor

## Sheet: cell-cell signalling
Â© 2000-2008 Ingenuity Systems, Inc. All rights reserved.
Name	Description	Entrez Gene ID for Human	Affymetrix	p-value	Fold Change	Networks	Location	Type
AP2M1	adaptor-related protein complex 2, mu 1 subunit	1173	200613_at	0.006	1.364	13	Cytoplasm	transporter
APOE	apolipoprotein E	348	203381_s_at	0.01	1.516	2	Extracellular Space	transporter
CAMK2G	calcium/calmodulin-dependent protein kinase (CaM kinase) II gamma	818	212669_at	0.001	1.497	3	Cytoplasm	kinase
CD200	CD200 molecule	4345	209582_s_at	0.006	1.311	4	Plasma Membrane	other
CHRM3	cholinergic receptor, muscarinic 3	1131	214596_at	0.005	2.315	2	Plasma Membrane	G-protein coupled receptor
CX3CL1	chemokine (C-X3-C motif) ligand 1	6376	823_at	0	1.437	1,5	Extracellular Space	cytokine
GABBR2	gamma-aminobutyric acid (GABA) B receptor, 2	9568	211679_x_at	0	1.631	3	Plasma Membrane	G-protein coupled receptor
GABRA1	gamma-aminobutyric acid (GABA) A receptor, alpha 1	2554	206678_at	0	1.359	3	Plasma Membrane	ion channel
GPI	glucose phosphate isomerase	2821	208308_s_at	0.006	1.399	2	Extracellular Space	enzyme
GRIA2	glutamate receptor, ionotropic, AMPA 2	2891	205358_at	0.002	2.252	4	Plasma Membrane	ion channel
HNT	neurotrimin	50863	222020_s_at	0.002	1.298	11	Plasma Membrane	other
HOMER1	homer homolog 1 (Drosophila)	9456	213793_s_at	0.001	1.746	1	Plasma Membrane	other
HTR2A	5-hydroxytryptamine (serotonin) receptor 2A	3356	207135_at	0.002	1.415	3	Plasma Membrane	G-protein coupled receptor
KRAS	v-Ki-ras2 Kirsten rat sarcoma viral oncogene homolog	3845	214352_s_at	0.005	1.614	1	Cytoplasm	enzyme
NRGN	neurogranin (protein kinase C substrate, RC3)	4900	204081_at	0.002	1.924	3	Cytoplasm	other
NRXN1	neurexin 1	9378	209914_s_at	0	1.728	10	Plasma Membrane	transporter
NRXN2	neurexin 2	9379	209983_s_at	0.002	1.285	10	Plasma Membrane	transporter
OPCML	opioid binding protein/cell adhesion molecule-like	4978	206215_at	0.002	1.214	11	Plasma Membrane	transmembrane receptor
PRKACA	protein kinase, cAMP-dependent, catalytic, alpha	5566	202801_at	0.003	1.361	2	Cytoplasm	kinase
SCN1B	sodium channel, voltage-gated, type I, beta	6324	205508_at	0.009	1.467	2	Plasma Membrane	ion channel
SIPA1L1	signal-induced proliferation-associated 1 like 1	26037	202255_s_at	0.003	1.363	10	Cytoplasm	other
SLC1A2	solute carrier family 1 (glial high affinity glutamate transporter), member 2	6506	208389_s_at	0.01	1.908	5	Plasma Membrane	transporter
SLIT2	slit homolog 2 (Drosophila)	9353	209897_s_at	0.001	1.268	3	Extracellular Space	other
SV2A	synaptic vesicle glycoprotein 2A	9900	203069_at	0.009	1.489	3	Cytoplasm	transporter
THY1	Thy-1 cell surface antigen	7070	208850_s_at	0	1.761	4	Plasma Membrane	other
