# Supplementary material for: Transcriptome Analysis of Synaptoneurosomes Identifies Neuroplasticity Genes Overexpressed in Incipient Alzheimer's Disease
Source: PLoS One. 2009 Mar 19;4(3):e4936. doi: 10.1371/journal.pone.0004936 (PMC2654156; doi:10.1371/journal.pone.0004936)
Supplement: Table S4 — Network representation of the biological processes generated by genes upregulated in IAD. The data set containing gene identifiers and corresponding expression values for the overexpressed C v IAD genes in the p<0.01 group were uploaded and overlaid onto a global molecular network developed from information contained in the Ingenuity Pathways Knowledge Base. Each gene identifier was mapped to its corresponding gene object in the Ingenuity Pathways Knowledge Base. Networks of these focus genes were then algorithmically generated based on their connectivity. Our genes fell into 24 Ingenuity defined networks. (0.02 MB XLS) [file pone.0004936.s005.xls]

## Sheet: Networks
© 2000-2008 Ingenuity Systems, Inc. All rights reserved.
ID	Molecules in Network	Score	Focus Molecules	Top Functions
1	ADD1,ARID1A,ARNT2,ATP1A1,ATP2B4,CDC2L5,CDC42BPA,Cofilin,CX3CL1,DGKZ,DUSP3,ELAVL4,EPHB6,ERK,F Actin,HOMER1,KRAS,M-RIP,MAPK8IP3,Mek,OSBPL1A,PCDH9,PHC2,Pkg,PPAP2B,PPFIBP1,PPP1R9A,PPP2R5E,RASGRP1,RGS4,RNH1,Rock,RYBP,SIN3B,TPI1	55	29	Cancer, Cell Morphology, Dermatological Diseases and Conditions
2	ABR,Akt,APOE,BAIAP2,CHRM3,COPA,CSNK1A1,Cyclin A,EPHA4,ETV5,Fgf,G protein beta gamma,GLG1,GPI,Insulin,LRRN3,Mapk,MAPK3,Nfat,NFAT5,NTRK3,PLC,PLC gamma,PRKACA,Rac,Ras homolog,Rb,SCN1B,SLC25A11,SNCB,SORBS2,SORL1,STMN2,SYT11,TRIO	40	23	Tissue Development, Immunological Disease, Cell Morphology
3	Actin,ADCY,CABP1,Calcineurin protein(s),Calmodulin,CAMK2B,CAMK2G,CaMKII,CAP2,CDK5R2,Creb,DNM1,ENC1,G alphai,GABAR-A,GABBR2,GABRA1,GABRA2 (includes EG:2555),GAP43,HTR2A,KCNC1,MYCBP2,NEUROD2,NFkB,NRGN,p70 S6k,Pdgf,PI3K,PIK3R1,PRKCZ,SLC8A2,SLIT2,SV2A,TUBA1B,Tubulin	37	22	Neurological Disease, Nutritional Disease, Psychological Disorders
4	ABHD2,APC,APC/APC2,ARHGEF4,BRD2,CACNG2,CD200,CHAT (includes EG:1103),CHD8,CRBN,CUX1,DDIT3,DYNC1H1,glycosylphosphatidylinositol,GRIA2,GSK3A,Histone h3,Jnk,KCNMA1,KIAA0265,MAP1B,NSF,P38 MAPK,PDE3B,PDGF BB,PIK3R1,Pka,Pkc(s),PPM2C,PRKAR1B,Ras,SCD,SMARCA4,SYNE1,THY1	26	17	Cell Morphology, Renal and Urological System Development and Function, Nervous System Development and Function
5	ADCY,ADCYAP1,CASP6,CX3CL1,DDIT3,DUT (includes EG:1854),E2F1,ESR1,FADS2,FAS,glycosylphosphatidylinositol,GSTP1,HIST2H3C,IL13,LMO4,LPHN3,LPPR4,MAPK8,PAPSS1,PCDH7,PIK3R1,PKN2,PLD3,PRDM2,RAPGEF5,RGS3,RGS4,RNF34,SELP,SFTPA1B,SLC1A2,SPAG9,TFAP2C,TNF,WNT5A	24	16	Cell Signaling, Molecular Transport, Vitamin and Mineral Metabolism
6	ARF6,ARHGDIA,beta-estradiol,C1ORF21,CASP6,CDH2,dihydrotestosterone,DUSP3,FOXC2,GOSR1,GPX3,GSTP1,INSR,IQSEC1,KALRN,KLK1B9,KLK1B22,LTBP1,MBD4,MYBL2,NPEPPS,PARD6B,PDE3B,PENK,PIK3R1,PLXNA1,PRDM2,PRKCZ,RAC1,RB1,SEZ6L2,TMF1,TSPAN5,USP4,ZNF638	22	15	Cell Cycle, Carbohydrate Metabolism, Molecular Transport
7	ACTN1,COIL,COPB2,COX11,EFTUD2,EPM2AIP1,FAIM2,FAM115A,FAS,GSTK1,GTF2I,HNF4A,KLC4,KLHDC3,LSM3,LSM4,NCBP1 (includes EG:4686),NUDCD3,NXT2,PPME1,PPP1CA,PPP1R10,PPP1R11,PPP1R3C,PPP2R5B,PRMT1,PRPF4,PRPF31,PWP1,RAB3GAP1,RP1-21O18.1,SART3,SF3B4,SLC38A1,USO1	20	14	Carbohydrate Metabolism, Molecular Transport, RNA Post-Transcriptional Modification
8	ADAM10,AKT3,amino acids,CADM1,CCND1,CELSR2,CHAT (includes EG:1103),CSNK1D,CYC1,DKFZP564O0823,GARS,GSK3A,HNRPD,KATNB1,KIAA0999,LEF/TCF,LTBP1,MAST3,MYBL1,MYH4,NLK,PIK3R1,progesterone,PTEN,PTOV1,PTPRD,RAPGEF3,RPS6KB2,SERINC3,STK11,TGFB1,TGFBR1,TUBB2A,USP11,USP19	18	13	Amino Acid Metabolism, Post-Translational Modification, Small Molecule Biochemistry
9	AARS,AGT,C12ORF10,CASP6,CHD9,DDIT3,EFTUD2,EGFR,EIF3C,EIF3D,EIF3H,EIF3J,EIF4G3,FAS,FLRT2,GPC1,HSPA1A,HSPH1,IFNG,INA,KIAA0182,MYC,NCAM1,NUMA1,PDK1,PKM2,PLAT,PRPF8,PSMD1,RFX1,RUSC1,SCAMP1,SCAMP5,TUBB2A,XRCC6	18	13	Protein Synthesis, Renal and Urological Disease, Cancer
10	BAG5,C22ORF9,DYRK1A,FAM82C,FRYL,GAPVD1,HECTD1,KLC4,LARP1,LSR,MAP3K1,MICAL-L1,MLLT4,NLGN1,NLGN3,NRXN1,NRXN2,NXPH1,OSBPL3,PHYHIP,RAI14,RALGPS2,RCN2,SAMD4B,SH3BP5L,SIPA1L1,SLC25A6,SPOP,STRN4,SUV420H1,TRAF6,WIPI-2,YWHAA,YWHAB,YWHAG	15	11	Nervous System Development and Function, Molecular Transport, Small Molecule Biochemistry
11	A2BP1,AES,ATF4,ATN1,CAST,CDC25B,CDKN1A,CSNK2B,CTSK,FAS,Glutathione peroxidase,GPX3,HJURP,HNT,KHDRBS3,LTBP1,MAGEA11,MLL,NOC2L,OPCML,PCBP4,PRNP,PSRC1,RAB15,RACGAP1,SH3GL3,SIAH1,TMEM97,TOPORS,TP53,TRIM44,TSG101,TTC5,VGLL4,WDR5	13	10	Cellular Assembly and Organization, Cellular Function and Maintenance, Cell Cycle
12	14-3-3,APOC3,ARHGEF7,B4GALT5,DAPK1,FOXH1,HGS,IFNB1,IRF3,KIAA0256,KIAA1033,KIF1A,LEF1,LEMD3,LTBP1,NFYC,NR1D1,NR1D2,OBSL1,OR3A2,PARD3,PCDH1,PDK1,PRSS3 (includes EG:5646),PUM1,RAB14,RANBP9,RGS3,Rock,SMAD2,SMAD3,SP1,Tgf beta,ZNF148,ZNF292	13	10	Gene Expression, Embryonic Development, Tissue Development
13	AP1B1,AP2B1,AP2M1,AP2S1,ATF7IP,ATP8,ATP5A1,ATP5H (includes EG:10476),ATP5H (includes EG:641434),ATP5J2,ATP6AP1,ATP6V0A1,ATP6V0A2,ATP6V0B,ATP6V0D2,ATP6V0E1,ATP6V0E2,ATP6V1A,ATP6V1B1,ATP6V1C1,ATP6V1C2,ATP6V1E2,ATP6V1F,ATP6V1G1,ATP6V1G3,FMR1,FXR2,H+-transporting two-sector ATPase,HNF4A,MMP14,OGDH,RALBP1,TCIRG1,TTC3	5	5	Molecular Transport, Protein Trafficking, Dermatological Diseases and Conditions
14	MICAL2,TGFB3	2	1	Embryonic Development, Cellular Development, Cellular Growth and Proliferation
15	PTN,SLC25A36	2	1	Cellular Growth and Proliferation, Cellular Movement, Connective Tissue Development and Function
16	MGRN1,TSG101	2	1	Neurological Disease, Post-Translational Modification, Cell Cycle
17	CADM1,CADM3	2	1	Cancer, Cell-To-Cell Signaling and Interaction, Cellular Compromise
18	CYP46A,CYP46A1,Paired donor oxygen oxidoreductase	2	1	Lipid Metabolism, Small Molecule Biochemistry
19	DNMBP,NCK2,WAS,WIPF2	1	1	Cell-To-Cell Signaling and Interaction, Cellular Assembly and Organization, Cell Morphology
20	BSCL2,MST150,TMEM19,USE1,YBX2	1	1	Genetic Disorder, Hematological Disease, Metabolic Disease
21	CDS1,Diacylglycerol cholinephosphotransferase,MUS81,nucleoside triphosphate,Phosphatidate cytidylyltransferase	1	1	Cell Cycle, DNA Replication, Recombination, and Repair, Visual System Development and Function
22	JARID1B,OLFR672,OLFR992,OR13H1,OR5D18,OR6A2,REEP1	1	1	Nervous System Development and Function, Tissue Development, Cell Cycle
