# Supplementary material for: Transcriptome Analysis of Synaptoneurosomes Identifies Neuroplasticity Genes Overexpressed in Incipient Alzheimer's Disease
Source: PLoS One. 2009 Mar 19;4(3):e4936. doi: 10.1371/journal.pone.0004936 (PMC2654156; doi:10.1371/journal.pone.0004936)
Supplement: Table S5 — Regulatory elements present in the 3′UTR of genes important for nervous system function and development. The 3′UTR of each gene with changed expression in IAD was analyzed for four potential consensus sequence sites regulating translation; the cytoplasmic polyadenylation element (CPE), the FMRP binding G-quartet, the AU-rich element which binds to the mRNA binding protein HuD, and a putative pumilio binding site. At least one of these putative regulatory sequence(s) is encoded in the 3′UTR of 24 out of 49 total genes and 3 and 10 of these contain more than one regulatory sequence. Twenty-five mRNAs do not contain any of the consensus sequences although two of these genes, GAP-43 and neurogranin, important for neuroplasticity, are known to encode other regulatory elements. Reported genome content of the regulatory sequences is included at the bottom of the relevant column. (0.31 MB XLS) [file pone.0004936.s006.xls]

## Sheet: Gene ID
Gene Symbol	Gene ID	Species	David Gene Name
AKAP9	10142	HOMO SAPIENS	A KINASE (PRKA) ANCHOR PROTEIN (YOTIAO) 9
AP2M1	1173	HOMO SAPIENS	ADAPTOR-RELATED PROTEIN COMPLEX 2, MU 1 SUBUNIT
APC	324	HOMO SAPIENS	ADENOMATOSIS POLYPOSIS COLI
APOE	348	HOMO SAPIENS	APOLIPOPROTEIN E
ARNT2	9915	HOMO SAPIENS	ARYL-HYDROCARBON RECEPTOR NUCLEAR TRANSLOCATOR 2
CABP1	9478	HOMO SAPIENS	CALCIUM BINDING PROTEIN 1 (CALBRAIN)
CDK5R2	8941	HOMO SAPIENS	CYCLIN-DEPENDENT KINASE 5, REGULATORY SUBUNIT 2 (P39)
CHRM3	1131	HOMO SAPIENS	CHOLINERGIC RECEPTOR, MUSCARINIC 3
CHRNB3	1142	HOMO SAPIENS	CHOLINERGIC RECEPTOR, NICOTINIC, BETA 3
DNM1	1759	HOMO SAPIENS	DYNAMIN 1
ELAVL4	1996	HOMO SAPIENS	ELAV (EMBRYONIC LETHAL, ABNORMAL VISION, DROSOPHILA)-LIKE 4 (HU ANTIGE...
ENC1	8507	HOMO SAPIENS	ECTODERMAL-NEURAL CORTEX (WITH BTB-LIKE DOMAIN)
EPHA4	2043	HOMO SAPIENS	EPH RECEPTOR A4
EPHB6	2051	HOMO SAPIENS	EPH RECEPTOR B6
GABBR2	9568	HOMO SAPIENS	GAMMA-AMINOBUTYRIC ACID (GABA) B RECEPTOR, 2
GABRA1	2554	HOMO SAPIENS	GAMMA-AMINOBUTYRIC ACID (GABA) A RECEPTOR, ALPHA 1
GAP43	2596	HOMO SAPIENS	GROWTH ASSOCIATED PROTEIN 43
GRIA2	2891	HOMO SAPIENS	GLUTAMATE RECEPTOR, IONOTROPIC, AMPA 2
HNT	50863	HOMO SAPIENS	NEUROTRIMIN
HOMER1	9456	HOMO SAPIENS	HOMER HOMOLOG 1 (DROSOPHILA)
HTR2A	3356	HOMO SAPIENS	5-HYDROXYTRYPTAMINE (SEROTONIN) RECEPTOR 2A
KCNN2	3781	HOMO SAPIENS	POTASSIUM INTERMEDIATE/SMALL CONDUCTANCE CALCIUM-ACTIVATED CHANNEL, SU...
KIF1A	547	HOMO SAPIENS	KINESIN FAMILY MEMBER 1A
LMO4	8543	HOMO SAPIENS	LIM DOMAIN ONLY 4
LPPR4	9890	HOMO SAPIENS	PLASTICITY RELATED GENE 1
MAPK8IP3	23162	HOMO SAPIENS	MITOGEN-ACTIVATED PROTEIN KINASE 8 INTERACTING PROTEIN 3
NEUROD2	4761	HOMO SAPIENS	NEUROGENIC DIFFERENTIATION 2
NRGN	4900	HOMO SAPIENS	NEUROGRANIN (PROTEIN KINASE C SUBSTRATE, RC3)
NRXN1	9378	HOMO SAPIENS	NEUREXIN 1
NRXN2	9379	HOMO SAPIENS	NEUREXIN 2
OPCML	4978	HOMO SAPIENS	OPIOID BINDING PROTEIN/CELL ADHESION MOLECULE-LIKE
PIK3R1	5295	HOMO SAPIENS	PHOSPHOINOSITIDE-3-KINASE, REGULATORY SUBUNIT 1 (P85 ALPHA)
PRKACA	5566	HOMO SAPIENS	PROTEIN KINASE, CAMP-DEPENDENT, CATALYTIC, ALPHA
PRKAR1B	5575	HOMO SAPIENS	PROTEIN KINASE, CAMP-DEPENDENT, REGULATORY, TYPE I, BETA
PRKCZ	5590	HOMO SAPIENS	PROTEIN KINASE C, ZETA
PTPRD	5789	HOMO SAPIENS	PROTEIN TYROSINE PHOSPHATASE, RECEPTOR TYPE, D
PUM1	9698	HOMO SAPIENS	PUMILIO HOMOLOG 1 (DROSOPHILA)
RAB14	51552	HOMO SAPIENS	RAB14, MEMBER RAS ONCOGENE FAMILY
SCN1B	6324	HOMO SAPIENS	SODIUM CHANNEL, VOLTAGE-GATED, TYPE I, BETA
SLC1A2	6506	HOMO SAPIENS	SOLUTE CARRIER FAMILY 1 (GLIAL HIGH AFFINITY GLUTAMATE TRANSPORTER), M...
SLIT2	9353	HOMO SAPIENS	SLIT HOMOLOG 2 (DROSOPHILA)
SNCB	6620	HOMO SAPIENS	SYNUCLEIN, BETA
SV2A	9900	HOMO SAPIENS	SYNAPTIC VESICLE GLYCOPROTEIN 2A
SYNGR1	9145	HOMO SAPIENS	SYNAPTOGYRIN 1
SYT11	23208	HOMO SAPIENS	SYNAPTOTAGMIN XI
THY1	7070	HOMO SAPIENS	THY-1 CELL SURFACE ANTIGEN
TRIO	7204	HOMO SAPIENS	TRIPLE FUNCTIONAL DOMAIN (PTPRF INTERACTING)

## Sheet: Affy annotation
Probe Set ID	Gene Title	Gene Symbol	GO Biological Process Description	GO Molecular Function Description	GO Cellular Component Description	Pathway	Pathway Hyperlink
200613_at	adaptor-related protein complex 2, mu 1 subunit	AP2M1	transport	transporter activity	coated pit
			intracellular protein transport	protein binding	clathrin vesicle coat
				lipid binding
200927_s_at	RAB14, member RAS oncogene family	RAB14	Golgi to endosome transport	nucleotide binding	membrane fraction
			small GTPase mediated signal transduction	GTPase activity	lysosome
			small GTPase mediated signal transduction	GTP binding	early endosome
			neurotransmitter secretion		late endosome
			protein transport		rough endoplasmic reticulum
			vesicle-mediated transport		Golgi stack
			intracellular transport		cytosol
			transport		plasma membrane
					membrane
					trans-Golgi network transport vesicle
					nuclear envelope-endoplasmic reticulum network
					perinuclear region
200928_s_at	RAB14, member RAS oncogene family	RAB14	Golgi to endosome transport	nucleotide binding	membrane fraction
			small GTPase mediated signal transduction	GTPase activity	lysosome
			small GTPase mediated signal transduction	GTP binding	early endosome
			neurotransmitter secretion		late endosome
			protein transport		rough endoplasmic reticulum
			vesicle-mediated transport		Golgi stack
			intracellular transport		cytosol
			transport		plasma membrane
					membrane
					trans-Golgi network transport vesicle
					nuclear envelope-endoplasmic reticulum network
					perinuclear region
201164_s_at	ring finger protein (C3H2C3 type) 6	RNF6	regulation of translation	protein binding
	pumilio homolog 1 (Drosophila)	PUM1	regulation of protein biosynthesis	zinc ion binding
			ubiquitin cycle	metal ion binding
				RNA binding
				binding
				zinc ion binding
201165_s_at	pumilio homolog 1 (Drosophila)	PUM1	regulation of translation	RNA binding
			regulation of protein biosynthesis	binding
201166_s_at	pumilio homolog 1 (Drosophila)	PUM1	regulation of translation	RNA binding
			regulation of protein biosynthesis	binding
201340_s_at	ectodermal-neural cortex (with BTB-like domain)	ENC1	development	actin binding	nucleus
			nervous system development	protein binding	cytoskeleton
			development
201341_at	ectodermal-neural cortex (with BTB-like domain)	ENC1	development	actin binding	nucleus
			nervous system development	protein binding	cytoskeleton
			development
202178_at	protein kinase C, zeta	PRKCZ	protein amino acid phosphorylation	nucleotide binding	membrane fraction	G_Protein_Signaling	GENMAPP/KEGG
			protein amino acid phosphorylation	protein serine/threonine kinase activity	cytoplasm	Wnt_signaling	GENMAPP/KEGG
			anti-apoptosis	atypical protein kinase C activity	plasma membrane	Calcium_regulation_in_cardiac_cells	GENMAPP/KEGG
			intracellular signaling cascade	protein binding		Smooth_muscle_contraction	GENMAPP/KEGG
			signal transduction	ATP binding
				zinc ion binding
				transferase activity
				diacylglycerol binding
				metal ion binding
				protein kinase activity
				atypical protein kinase C activity
				kinase activity
				protein kinase activity
202801_at	protein kinase, cAMP-dependent, catalytic, alpha	PRKACA	protein amino acid phosphorylation	nucleotide binding	nucleus	G_Protein_Signaling	GENMAPP/KEGG
			protein amino acid phosphorylation	protein serine/threonine kinase activity	cAMP-dependent protein kinase complex	G_Protein_Signaling	GENMAPP/KEGG
				cAMP-dependent protein kinase activity		Calcium_regulation_in_cardiac_cells	GENMAPP/KEGG
				protein binding		Calcium_regulation_in_cardiac_cells	GENMAPP/KEGG
				ATP binding		Smooth_muscle_contraction	GENMAPP/KEGG
				transferase activity		Smooth_muscle_contraction	GENMAPP/KEGG
				protein kinase activity
				ATP binding
				kinase activity
202986_at	aryl-hydrocarbon receptor nuclear translocator 2	ARNT2	response to hypoxia	transcription factor activity	nucleus
			embryonic development (sensu Mammalia)	transcription factor activity	nucleus
			regulation of transcription, DNA-dependent	signal transducer activity
			signal transduction	aryl hydrocarbon receptor nuclear translocator activity
			signal transduction	aryl hydrocarbon receptor binding
			central nervous system development	protein heterodimerization activity
			response to xenobiotic stimulus	protein heterodimerization activity
			response to toxin	transcription regulator activity
			neuron lineage restriction	transcription regulator activity
			positive regulation of transcription	DNA binding
			regulation of transcription
			regulation of transcription
			transcription
203069_at	synaptic vesicle glycoprotein 2A	SV2A	neurotransmitter transport	transporter activity	membrane
			transport		integral to membrane
					synapse
203381_s_at	apolipoprotein E	APOE	response to reactive oxygen species	beta-amyloid binding	extracellular region	Statin_Pathway_PharmGKB	GENMAPP/KEGG
			lipid transport	lipid transporter activity	extracellular region
			induction of apoptosis	phospholipid binding	cytoplasm
			cytoskeleton organization and biogenesis	heparin binding	chylomicron
			synaptic transmission, cholinergic	antioxidant activity	extracellular region
			learning and/or memory	tau protein binding
			circulation	apolipoprotein E receptor binding
			regulation of axon extension	protein binding
			lipoprotein metabolism	lipid binding
			cholesterol homeostasis	heparin binding
			intracellular transport	lipid binding
			regulation of neuronal synaptic plasticity	low-density lipoprotein receptor binding
			protein tetramerization
			transport
			lipid transport
			lipoprotein metabolism
203382_s_at	apolipoprotein E	APOE	response to reactive oxygen species	beta-amyloid binding	extracellular region	Statin_Pathway_PharmGKB	GENMAPP/KEGG
			lipid transport	lipid transporter activity	extracellular region
			induction of apoptosis	phospholipid binding	cytoplasm
			cytoskeleton organization and biogenesis	heparin binding	chylomicron
			synaptic transmission, cholinergic	antioxidant activity	extracellular region
			learning and/or memory	tau protein binding
			circulation	apolipoprotein E receptor binding
			regulation of axon extension	protein binding
			lipoprotein metabolism	lipid binding
			cholesterol homeostasis	heparin binding
			intracellular transport	lipid binding
			regulation of neuronal synaptic plasticity	low-density lipoprotein receptor binding
			protein tetramerization
			transport
			lipid transport
			lipoprotein metabolism
203525_s_at	adenomatosis polyposis coli	APC	protein complex assembly	beta-catenin binding	nucleus	Wnt_signaling	GENMAPP/KEGG
			cell cycle	microtubule binding	lateral plasma membrane	Wnt_signaling	GENMAPP/KEGG
			cell adhesion	protein binding		Wnt_signaling	GENMAPP/KEGG
			signal transduction	binding		Wnt_signaling	GENMAPP/KEGG
			Wnt receptor signaling pathway	protein binding
			negative regulation of progression through cell cycle
			regulation of progression through cell cycle
203526_s_at	adenomatosis polyposis coli	APC	protein complex assembly	beta-catenin binding	nucleus	Wnt_signaling	GENMAPP/KEGG
			cell cycle	microtubule binding	lateral plasma membrane	Wnt_signaling	GENMAPP/KEGG
			cell adhesion	protein binding		Wnt_signaling	GENMAPP/KEGG
			signal transduction	binding		Wnt_signaling	GENMAPP/KEGG
			Wnt receptor signaling pathway	protein binding
			negative regulation of progression through cell cycle
			regulation of progression through cell cycle
203527_s_at	adenomatosis polyposis coli	APC	protein complex assembly	beta-catenin binding	nucleus	Wnt_signaling	GENMAPP/KEGG
			cell cycle	microtubule binding	lateral plasma membrane	Wnt_signaling	GENMAPP/KEGG
			cell adhesion	protein binding		Wnt_signaling	GENMAPP/KEGG
			signal transduction	binding		Wnt_signaling	GENMAPP/KEGG
			Wnt receptor signaling pathway	protein binding
			negative regulation of progression through cell cycle
			regulation of progression through cell cycle
203849_s_at	kinesin family member 1A	KIF1A	microtubule-based movement	nucleotide binding	microtubule
			anterograde axon cargo transport	microtubule motor activity	microtubule associated complex
				ATP binding
				motor activity
				motor activity
203850_s_at	kinesin family member 1A	KIF1A	microtubule-based movement	nucleotide binding	microtubule
			anterograde axon cargo transport	microtubule motor activity	microtubule associated complex
				ATP binding
				motor activity
				motor activity
204081_at	neurogranin (protein kinase C substrate, RC3)	NRGN	signal transduction	calmodulin binding
			nervous system development	calmodulin binding
204287_at	synaptogyrin 1	SYNGR1			integral to plasma membrane
					membrane
					synapse
					integral to membrane
204471_at	growth associated protein 43	GAP43	regulation of cell growth	calmodulin binding	membrane
			protein kinase C activation
			nervous system development
			response to wounding
			cell differentiation
			regulation of growth
			development
			nervous system development
204718_at	EPH receptor B6	EPHB6	protein amino acid phosphorylation	nucleotide binding	membrane
			transmembrane receptor protein tyrosine kinase signaling pathway	protein-tyrosine kinase activity	integral to membrane
				receptor activity
				ephrin receptor activity
				ATP binding
				protein kinase activity
				receptor activity
				ephrin receptor activity
205358_at	glutamate receptor, ionotropic, AMPA 2	GRIA2	ion transport	receptor activity	plasma membrane
			signal transduction	ionotropic glutamate receptor activity	membrane
			synaptic transmission	alpha-amino-3-hydroxy-5-methyl-4-isoxazole propionate selective glutamate receptor activity	integral to membrane
			transport	ion channel activity	postsynaptic membrane
				glutamate-gated ion channel activity
				kainate selective glutamate receptor activity
				glutamate receptor activity
205712_at	protein tyrosine phosphatase, receptor type, D	PTPRD	protein amino acid dephosphorylation	receptor activity	integral to plasma membrane	Cell adhesion molecules (CAMs)	GENMAPP/KEGG
			phosphate metabolism	transmembrane receptor protein tyrosine phosphatase activity	membrane	Adherens junction	GENMAPP/KEGG
			transmembrane receptor protein tyrosine phosphatase signaling pathway	hydrolase activity	integral to membrane	Jak-STAT signaling pathway	GENMAPP/KEGG
			protein amino acid dephosphorylation	phosphoprotein phosphatase activity		T cell receptor signaling pathway	GENMAPP/KEGG
				protein tyrosine phosphatase activity		B cell receptor signaling pathway	GENMAPP/KEGG
						Leukocyte transendothelial migration	GENMAPP/KEGG
						Insulin signaling pathway	GENMAPP/KEGG
						Adipocytokine signaling pathway	GENMAPP/KEGG
						Type I diabetes mellitus	GENMAPP/KEGG
						Epithelial cell signaling in Helicobacter pylori	GENMAPP/KEGG
205852_at	cyclin-dependent kinase 5, regulatory subunit 2 (p39)	CDK5R2	regulation of cyclin-dependent protein kinase activity	cyclin-dependent protein kinase 5 activator activity	cyclin-dependent protein kinase 5 activator complex
				kinase activity
206051_at	ELAV (embryonic lethal, abnormal vision, Drosophila)-like 4 (Hu antigen D)	ELAVL4	mRNA processing	nucleotide binding
			RNA processing	RNA binding
				RNA binding
				mRNA 3'-UTR binding
				nucleic acid binding
206114_at	EPH receptor A4	EPHA4	protein amino acid phosphorylation	nucleotide binding	integral to plasma membrane	Calcium signaling pathway	GENMAPP/KEGG
			signal transduction	receptor activity	membrane	Cytokine-cytokine receptor interaction	GENMAPP/KEGG
			transmembrane receptor protein tyrosine kinase signaling pathway	ephrin receptor activity	integral to membrane	Apoptosis	GENMAPP/KEGG
				ATP binding		Dorso-ventral axis formation	GENMAPP/KEGG
				transferase activity		Axon guidance	GENMAPP/KEGG
				protein kinase activity		VEGF signaling pathway	GENMAPP/KEGG
				protein-tyrosine kinase activity		Focal adhesion	GENMAPP/KEGG
				kinase activity		Adherens junction	GENMAPP/KEGG
				transmembrane receptor protein tyrosine kinase activity		Gap junction	GENMAPP/KEGG
						Hematopoietic cell lineage	GENMAPP/KEGG
						Long-term depression	GENMAPP/KEGG
						Regulation of actin cytoskeleton	GENMAPP/KEGG
						Insulin signaling pathway	GENMAPP/KEGG
						GnRH signaling pathway	GENMAPP/KEGG
						Type II diabetes mellitus	GENMAPP/KEGG
						Dentatorubropallidoluysian atrophy (DRPLA)	GENMAPP/KEGG
						Epithelial cell signaling in Helicobacter pylori	GENMAPP/KEGG
						Colorectal cancer	GENMAPP/KEGG
206215_at	opioid binding protein/cell adhesion molecule-like	OPCML	cell adhesion	opioid receptor activity	plasma membrane
			cell adhesion	protein binding	integral to plasma membrane
			neuron recognition	GPI anchor binding	membrane
					integral to membrane
206678_at	gamma-aminobutyric acid (GABA) A receptor, alpha 1	GABRA1	ion transport	GABA-A receptor activity	integral to plasma membrane
			chloride transport	ion channel activity	postsynaptic membrane
			gamma-aminobutyric acid signaling pathway	extracellular ligand-gated ion channel activity	membrane
			transport	chloride channel activity	integral to membrane
			gamma-aminobutyric acid signaling pathway	neurotransmitter receptor activity
			transport	chloride ion binding
				GABA-A receptor activity
				receptor activity
207014_at	gamma-aminobutyric acid (GABA) A receptor, alpha 2	GABRA2	regulation of neurotransmitter levels	GABA-A receptor activity	integral to plasma membrane
			ion transport	ion channel activity	postsynaptic membrane
			chloride transport	extracellular ligand-gated ion channel activity	membrane
			gamma-aminobutyric acid signaling pathway	chloride channel activity	integral to membrane
			transport	benzodiazepine receptor activity
			gamma-aminobutyric acid signaling pathway	chloride ion binding
			transport	neurotransmitter receptor activity
				receptor activity
207135_at	5-hydroxytryptamine (serotonin) receptor 2A	HTR2A	signal transduction	rhodopsin-like receptor activity	integral to plasma membrane	GPCRDB_Class_A_Rhodopsin-like	GENMAPP/KEGG
			serotonin receptor signaling pathway	receptor activity	membrane	Monoamine_GPCRs	GENMAPP/KEGG
			synaptic transmission	serotonin receptor activity	integral to membrane
			G-protein coupled receptor protein signaling pathway	signal transducer activity
				G-protein coupled receptor activity
207853_s_at	synuclein, beta	SNCB		phospholipase inhibitor activity	cytoplasm
207859_s_at	cholinergic receptor, nicotinic, beta 3	CHRNB3	ion transport	nicotinic acetylcholine-activated cation-selective channel activity	nicotinic acetylcholine-gated receptor-channel complex
			signal transduction	ion channel activity	integral to membrane
			synaptic transmission, cholinergic	extracellular ligand-gated ion channel activity	postsynaptic membrane
			transport	channel or pore class transporter activity	membrane
			transport	neurotransmitter receptor activity
				nicotinic acetylcholine-activated cation-selective channel activity
207870_at	A kinase (PRKA) anchor protein (yotiao) 9	AKAP9	transport	receptor binding	centrosome	G_Protein_Signaling	GENMAPP/KEGG
			signal transduction	protein binding	cytoskeleton	G_Protein_Signaling	GENMAPP/KEGG
			synaptic transmission			G_Protein_Signaling	GENMAPP/KEGG
						G_Protein_Signaling	GENMAPP/KEGG
208178_x_at	triple functional domain (PTPRF interacting)	TRIO	protein amino acid phosphorylation	nucleotide binding	intracellular
			transmembrane receptor protein tyrosine phosphatase signaling pathway	protein serine/threonine kinase activity
			regulation of Rho protein signal transduction	protein serine/threonine kinase activity
				Rho guanyl-nucleotide exchange factor activity
				ATP binding
				transferase activity
				protein kinase activity
				guanyl-nucleotide exchange factor activity
				kinase activity
				guanyl-nucleotide exchange factor activity
208320_at	calcium binding protein 1 (calbrain)	CABP1		enzyme inhibitor activity
				calcium ion binding
				calcium ion binding
				protein binding
208321_s_at	calcium binding protein 1 (calbrain)	CABP1		enzyme inhibitor activity
				calcium ion binding
				calcium ion binding
				protein binding
208389_s_at	solute carrier family 1 (glial high affinity glutamate transporter), member 2	SLC1A2	transport	L-glutamate transporter activity	membrane fraction
			dicarboxylic acid transport	symporter activity	membrane
			synaptic transmission	sodium:dicarboxylate symporter activity	integral to membrane
			L-glutamate transport
208850_s_at	Thy-1 cell surface antigen	THY1	angiogenesis	Rho GTPase activator activity	cytosol
			negative regulation of protein kinase activity	integrin binding	plasma membrane
			cytoskeleton organization and biogenesis	protein binding	integral to plasma membrane
			cell-cell adhesion	GPI anchor binding	external side of plasma membrane
			negative regulation of cell migration	GPI anchor binding	growth cone
			negative regulation of apoptosis		lipid raft
			positive regulation of GTPase activity		lipid raft
			mast cell activation		membrane
			retinal cone cell development		plasma membrane
			focal adhesion formation
			negative regulation of fibroblast proliferation
			positive regulation of peptidyl-tyrosine phosphorylation
			negative regulation of axonogenesis
			T cell receptor signaling pathway
			negative regulation of T cell receptor signaling pathway
			positive regulation of T cell activation
			positive regulation of release of sequestered calcium ion into cytosol
208851_s_at	Thy-1 cell surface antigen	THY1	angiogenesis	Rho GTPase activator activity	cytosol
			negative regulation of protein kinase activity	integrin binding	plasma membrane
			cytoskeleton organization and biogenesis	protein binding	integral to plasma membrane
			cell-cell adhesion	GPI anchor binding	external side of plasma membrane
			negative regulation of cell migration	GPI anchor binding	growth cone
			negative regulation of apoptosis		lipid raft
			positive regulation of GTPase activity		lipid raft
			mast cell activation		membrane
			retinal cone cell development		plasma membrane
			focal adhesion formation
			negative regulation of fibroblast proliferation
			positive regulation of peptidyl-tyrosine phosphorylation
			negative regulation of axonogenesis
			T cell receptor signaling pathway
			negative regulation of T cell receptor signaling pathway
			positive regulation of T cell activation
			positive regulation of release of sequestered calcium ion into cytosol
209010_s_at	triple functional domain (PTPRF interacting)	TRIO	protein amino acid phosphorylation	nucleotide binding	intracellular
			transmembrane receptor protein tyrosine phosphatase signaling pathway	protein serine/threonine kinase activity
			regulation of Rho protein signal transduction	protein serine/threonine kinase activity
				Rho guanyl-nucleotide exchange factor activity
				ATP binding
				transferase activity
				protein kinase activity
				guanyl-nucleotide exchange factor activity
				kinase activity
				guanyl-nucleotide exchange factor activity
209011_at	triple functional domain (PTPRF interacting)	TRIO	protein amino acid phosphorylation	nucleotide binding	intracellular
			transmembrane receptor protein tyrosine phosphatase signaling pathway	protein serine/threonine kinase activity
			regulation of Rho protein signal transduction	protein serine/threonine kinase activity
				Rho guanyl-nucleotide exchange factor activity
				ATP binding
				transferase activity
				protein kinase activity
				guanyl-nucleotide exchange factor activity
				kinase activity
				guanyl-nucleotide exchange factor activity
209012_at	triple functional domain (PTPRF interacting)	TRIO	protein amino acid phosphorylation	nucleotide binding	intracellular
			transmembrane receptor protein tyrosine phosphatase signaling pathway	protein serine/threonine kinase activity
			regulation of Rho protein signal transduction	protein serine/threonine kinase activity
				Rho guanyl-nucleotide exchange factor activity
				ATP binding
				transferase activity
				protein kinase activity
				guanyl-nucleotide exchange factor activity
				kinase activity
				guanyl-nucleotide exchange factor activity
209013_x_at	triple functional domain (PTPRF interacting)	TRIO	protein amino acid phosphorylation	nucleotide binding	intracellular
			transmembrane receptor protein tyrosine phosphatase signaling pathway	protein serine/threonine kinase activity
			regulation of Rho protein signal transduction	protein serine/threonine kinase activity
				Rho guanyl-nucleotide exchange factor activity
				ATP binding
				transferase activity
				protein kinase activity
				guanyl-nucleotide exchange factor activity
				kinase activity
				guanyl-nucleotide exchange factor activity
209197_at	synaptotagmin XI	SYT11	transport	transporter activity	synaptic vesicle
				calcium ion binding	membrane
				metal ion binding	integral to membrane
					synapse
209198_s_at	synaptotagmin XI	SYT11	transport	transporter activity	synaptic vesicle
				calcium ion binding	membrane
				metal ion binding	integral to membrane
					synapse
209204_at	LIM domain only 4	LMO4	neural tube closure	transcription factor activity	transcription factor complex
			transcription	transcription factor binding
			regulation of transcription, DNA-dependent	zinc ion binding
			transcription from RNA polymerase II promoter	metal ion binding
				protein binding
209205_s_at	LIM domain only 4	LMO4	neural tube closure	transcription factor activity	transcription factor complex
			transcription	transcription factor binding	mitochondrion
			regulation of transcription, DNA-dependent	zinc ion binding
			transcription from RNA polymerase II promoter	metal ion binding
			protein folding	protein binding
			cellular protein metabolism	nucleotide binding
			mitochondrial electron transport, NADH to ubiquinone	protein binding
				ATP binding
				unfolded protein binding
				NADH dehydrogenase (ubiquinone) activity
209897_s_at	slit homolog 2 (Drosophila)	SLIT2	ureteric bud development	follicle stimulating hormone receptor activity	extracellular region
			chemotaxis	receptor binding	extracellular space
			G-protein coupled receptor protein signaling pathway	calcium ion binding	integral to membrane
			nervous system development	protein binding
			mesoderm migration
			sensory perception of smell
			neuron recognition
			motor axon guidance
			glial cell migration
			cell differentiation
			positive regulation of axonogenesis
			induction of negative chemotaxis
			induction of negative chemotaxis
			development
			nervous system development
			axon guidance
209914_s_at	neurexin 1	NRXN1	cell adhesion	receptor activity	integral to plasma membrane
			axon guidance	protein binding	membrane
				protein binding	integral to membrane
209915_s_at	neurexin 1	NRXN1	cell adhesion	receptor activity	integral to plasma membrane
			axon guidance	protein binding	membrane
				protein binding	integral to membrane
209956_s_at	calcium/calmodulin-dependent protein kinase (CaM kinase) II beta	CAMK2B	protein amino acid phosphorylation	nucleotide binding		Calcium_regulation_in_cardiac_cells	GENMAPP/KEGG
			protein amino acid phosphorylation	protein serine/threonine kinase activity		Smooth_muscle_contraction	GENMAPP/KEGG
			signal transduction	calcium- and calmodulin-dependent protein kinase activity		Calcium signaling pathway	GENMAPP/KEGG
				calmodulin binding		Wnt signaling pathway	GENMAPP/KEGG
				ATP binding		Tight junction	GENMAPP/KEGG
				transferase activity		Long-term potentiation	GENMAPP/KEGG
				protein kinase activity		Olfactory transduction	GENMAPP/KEGG
				kinase activity		GnRH signaling pathway	GENMAPP/KEGG
						Adipocytokine signaling pathway	GENMAPP/KEGG
209982_s_at	neurexin 2	NRXN2	cell adhesion	protein binding	membrane
					integral to membrane
209983_s_at	neurexin 2	NRXN2	cell adhesion	protein binding	membrane
					integral to membrane
209990_s_at	gamma-aminobutyric acid (GABA) B receptor, 2	GABBR2	signal transduction	receptor activity	integral to plasma membrane	GPCRDB_Class_C_Metabotropic_glutamate_pheromone	GENMAPP/KEGG
			G-protein coupled receptor protein signaling pathway	GABA-B receptor activity	postsynaptic membrane	GPCRDB_Class_C_Metabotropic_glutamate_pheromone	GENMAPP/KEGG
			negative regulation of adenylate cyclase activity	signal transducer activity	membrane
			synaptic transmission	G-protein coupled receptor activity	integral to membrane
			G-protein coupled receptor protein signaling pathway	GABA-B receptor activity
				metabotropic glutamate, GABA-B-like receptor activity
209991_x_at	gamma-aminobutyric acid (GABA) B receptor, 2	GABBR2	signal transduction	receptor activity	integral to plasma membrane	GPCRDB_Class_C_Metabotropic_glutamate_pheromone	GENMAPP/KEGG
			G-protein coupled receptor protein signaling pathway	GABA-B receptor activity	postsynaptic membrane	GPCRDB_Class_C_Metabotropic_glutamate_pheromone	GENMAPP/KEGG
			negative regulation of adenylate cyclase activity	signal transducer activity	membrane
			synaptic transmission	G-protein coupled receptor activity	integral to membrane
			G-protein coupled receptor protein signaling pathway	GABA-B receptor activity
				metabotropic glutamate, GABA-B-like receptor activity
210181_s_at	calcium binding protein 1 (calbrain)	CABP1		enzyme inhibitor activity
				calcium ion binding
				calcium ion binding
				protein binding
210271_at	neurogenic differentiation 2	NEUROD2	regulation of transcription from RNA polymerase II promoter	transcription factor activity	nucleus
			nervous system development	DNA binding
			cell differentiation	transcription regulator activity
			transcription
			regulation of transcription, DNA-dependent
			development
			regulation of transcription
210404_x_at	calcium/calmodulin-dependent protein kinase (CaM kinase) II beta	CAMK2B	protein amino acid phosphorylation	nucleotide binding		Calcium_regulation_in_cardiac_cells	GENMAPP/KEGG
			protein amino acid phosphorylation	protein serine/threonine kinase activity		Smooth_muscle_contraction	GENMAPP/KEGG
			signal transduction	calcium- and calmodulin-dependent protein kinase activity		Calcium signaling pathway	GENMAPP/KEGG
				calmodulin binding		Wnt signaling pathway	GENMAPP/KEGG
				ATP binding		Tight junction	GENMAPP/KEGG
				transferase activity		Long-term potentiation	GENMAPP/KEGG
				protein kinase activity		Olfactory transduction	GENMAPP/KEGG
				kinase activity		GnRH signaling pathway	GENMAPP/KEGG
						Adipocytokine signaling pathway	GENMAPP/KEGG
210613_s_at	synaptogyrin 1	SYNGR1			integral to plasma membrane
					membrane
					synapse
					integral to membrane
210962_s_at	A kinase (PRKA) anchor protein (yotiao) 9	AKAP9	transport	receptor binding	centrosome	G_Protein_Signaling	GENMAPP/KEGG
			signal transduction	protein binding	cytoskeleton	G_Protein_Signaling	GENMAPP/KEGG
			synaptic transmission			G_Protein_Signaling	GENMAPP/KEGG
						G_Protein_Signaling	GENMAPP/KEGG
211483_x_at	calcium/calmodulin-dependent protein kinase (CaM kinase) II beta	CAMK2B	protein amino acid phosphorylation	nucleotide binding		Calcium_regulation_in_cardiac_cells	GENMAPP/KEGG
			protein amino acid phosphorylation	protein serine/threonine kinase activity		Smooth_muscle_contraction	GENMAPP/KEGG
			signal transduction	calcium- and calmodulin-dependent protein kinase activity		Calcium signaling pathway	GENMAPP/KEGG
				calmodulin binding		Wnt signaling pathway	GENMAPP/KEGG
				ATP binding		Tight junction	GENMAPP/KEGG
				transferase activity		Long-term potentiation	GENMAPP/KEGG
				protein kinase activity		Olfactory transduction	GENMAPP/KEGG
				kinase activity		GnRH signaling pathway	GENMAPP/KEGG
						Adipocytokine signaling pathway	GENMAPP/KEGG
211503_s_at	RAB14, member RAS oncogene family	RAB14	Golgi to endosome transport	nucleotide binding	membrane fraction
			small GTPase mediated signal transduction	GTPase activity	lysosome
			small GTPase mediated signal transduction	GTP binding	early endosome
			neurotransmitter secretion		late endosome
			protein transport		rough endoplasmic reticulum
			vesicle-mediated transport		Golgi stack
			intracellular transport		cytosol
			transport		plasma membrane
					membrane
					trans-Golgi network transport vesicle
					nuclear envelope-endoplasmic reticulum network
					perinuclear region
211616_s_at	5-hydroxytryptamine (serotonin) receptor 2A	HTR2A	signal transduction	rhodopsin-like receptor activity	integral to plasma membrane	GPCRDB_Class_A_Rhodopsin-like	GENMAPP/KEGG
	5-hydroxytryptamine (serotonin) receptor 2A		serotonin receptor signaling pathway	receptor activity	membrane	Monoamine_GPCRs	GENMAPP/KEGG
			synaptic transmission	serotonin receptor activity	integral to membrane
			G-protein coupled receptor protein signaling pathway	signal transducer activity
				G-protein coupled receptor activity
211679_x_at	gamma-aminobutyric acid (GABA) B receptor, 2	GABBR2	signal transduction	receptor activity	integral to plasma membrane	GPCRDB_Class_C_Metabotropic_glutamate_pheromone	GENMAPP/KEGG
	gamma-aminobutyric acid (GABA) B receptor, 2		G-protein coupled receptor protein signaling pathway	GABA-B receptor activity	postsynaptic membrane	GPCRDB_Class_C_Metabotropic_glutamate_pheromone	GENMAPP/KEGG
			negative regulation of adenylate cyclase activity	signal transducer activity	membrane
			synaptic transmission	G-protein coupled receptor activity	integral to membrane
			G-protein coupled receptor protein signaling pathway	GABA-B receptor activity
				metabotropic glutamate, GABA-B-like receptor activity
212239_at	phosphoinositide-3-kinase, regulatory subunit 1 (p85 alpha)	PIK3R1	intracellular signaling cascade	insulin receptor binding	intracellular
			intracellular signaling cascade	insulin-like growth factor receptor binding	phosphoinositide 3-kinase complex
			insulin receptor signaling pathway	phosphatidylinositol binding	phosphoinositide 3-kinase complex, class IA
			phosphoinositide phosphorylation	kinase activity
			insulin-like growth factor receptor signaling pathway	protein phosphatase binding
			signal transduction	phosphoinositide 3-kinase regulator activity
				phosphoinositide 3-kinase regulator activity
				ErbB-3 class receptor binding
				insulin binding
				insulin receptor substrate binding
				protein binding
212240_s_at	phosphoinositide-3-kinase, regulatory subunit 1 (p85 alpha)	PIK3R1	intracellular signaling cascade	insulin receptor binding	intracellular
			intracellular signaling cascade	insulin-like growth factor receptor binding	phosphoinositide 3-kinase complex
			insulin receptor signaling pathway	phosphatidylinositol binding	phosphoinositide 3-kinase complex, class IA
			phosphoinositide phosphorylation	kinase activity
			insulin-like growth factor receptor signaling pathway	protein phosphatase binding
			signal transduction	phosphoinositide 3-kinase regulator activity
				phosphoinositide 3-kinase regulator activity
				ErbB-3 class receptor binding
				insulin binding
				insulin receptor substrate binding
				protein binding
212249_at	phosphoinositide-3-kinase, regulatory subunit 1 (p85 alpha)	PIK3R1	intracellular signaling cascade	insulin receptor binding	intracellular
			intracellular signaling cascade	insulin-like growth factor receptor binding	phosphoinositide 3-kinase complex
			insulin receptor signaling pathway	phosphatidylinositol binding	phosphoinositide 3-kinase complex, class IA
			phosphoinositide phosphorylation	kinase activity
			insulin-like growth factor receptor signaling pathway	protein phosphatase binding
			signal transduction	phosphoinositide 3-kinase regulator activity
				phosphoinositide 3-kinase regulator activity
				ErbB-3 class receptor binding
				insulin binding
				insulin receptor substrate binding
				protein binding
212555_at	protein kinase, cAMP-dependent, regulatory, type I, beta	PRKAR1B	protein amino acid phosphorylation	nucleotide binding	cAMP-dependent protein kinase complex	G_Protein_Signaling	GENMAPP/KEGG
	similar to cAMP-dependent protein kinase type I-beta regulatory subunit	LOC645595	signal transduction	cAMP-dependent protein kinase regulator activity	cAMP-dependent protein kinase complex	Calcium_regulation_in_cardiac_cells	GENMAPP/KEGG
			protein amino acid phosphorylation	cAMP binding		Smooth_muscle_contraction	GENMAPP/KEGG
				cAMP-dependent protein kinase regulator activity		G_Protein_Signaling	GENMAPP/KEGG
				kinase activity		Calcium_regulation_in_cardiac_cells	GENMAPP/KEGG
						Smooth_muscle_contraction	GENMAPP/KEGG
212559_at	protein kinase, cAMP-dependent, regulatory, type I, beta	PRKAR1B	protein amino acid phosphorylation	nucleotide binding	cAMP-dependent protein kinase complex	G_Protein_Signaling	GENMAPP/KEGG
	similar to cAMP-dependent protein kinase type I-beta regulatory subunit	LOC645595	signal transduction	cAMP-dependent protein kinase regulator activity	cAMP-dependent protein kinase complex	Calcium_regulation_in_cardiac_cells	GENMAPP/KEGG
			protein amino acid phosphorylation	cAMP binding		Smooth_muscle_contraction	GENMAPP/KEGG
				cAMP-dependent protein kinase regulator activity		G_Protein_Signaling	GENMAPP/KEGG
				kinase activity		Calcium_regulation_in_cardiac_cells	GENMAPP/KEGG
						Smooth_muscle_contraction	GENMAPP/KEGG
213177_at	mitogen-activated protein kinase 8 interacting protein 3	MAPK8IP3	vesicle-mediated transport	MAP-kinase scaffold activity	cytoplasm
			regulation of JNK cascade	kinesin binding	membrane
			proteolysis	protein kinase binding
				serine-type peptidase activity
213178_s_at	mitogen-activated protein kinase 8 interacting protein 3	MAPK8IP3	vesicle-mediated transport	MAP-kinase scaffold activity	cytoplasm
			regulation of JNK cascade	kinesin binding	membrane
			proteolysis	protein kinase binding
				serine-type peptidase activity
213276_at	Calcium/calmodulin-dependent protein kinase (CaM kinase) II beta	CAMK2B	protein amino acid phosphorylation	nucleotide binding		Calcium_regulation_in_cardiac_cells	GENMAPP/KEGG
			protein amino acid phosphorylation	protein serine/threonine kinase activity		Smooth_muscle_contraction	GENMAPP/KEGG
			signal transduction	calcium- and calmodulin-dependent protein kinase activity		Calcium signaling pathway	GENMAPP/KEGG
				calmodulin binding		Wnt signaling pathway	GENMAPP/KEGG
				ATP binding		Tight junction	GENMAPP/KEGG
				transferase activity		Long-term potentiation	GENMAPP/KEGG
				protein kinase activity		Olfactory transduction	GENMAPP/KEGG
				kinase activity		GnRH signaling pathway	GENMAPP/KEGG
						Adipocytokine signaling pathway	GENMAPP/KEGG
213362_at	protein tyrosine phosphatase, receptor type, D	PTPRD	protein amino acid dephosphorylation	receptor activity	integral to plasma membrane	Cell adhesion molecules (CAMs)	GENMAPP/KEGG
			phosphate metabolism	transmembrane receptor protein tyrosine phosphatase activity	membrane	Adherens junction	GENMAPP/KEGG
			transmembrane receptor protein tyrosine phosphatase signaling pathway	hydrolase activity	integral to membrane	Jak-STAT signaling pathway	GENMAPP/KEGG
			protein amino acid dephosphorylation	phosphoprotein phosphatase activity		T cell receptor signaling pathway	GENMAPP/KEGG
				protein tyrosine phosphatase activity		B cell receptor signaling pathway	GENMAPP/KEGG
						Leukocyte transendothelial migration	GENMAPP/KEGG
						Insulin signaling pathway	GENMAPP/KEGG
						Adipocytokine signaling pathway	GENMAPP/KEGG
						Type I diabetes mellitus	GENMAPP/KEGG
						Epithelial cell signaling in Helicobacter pylori	GENMAPP/KEGG
213496_at	plasticity related gene 1	LPPR4
213793_s_at	homer homolog 1 (Drosophila)	HOMER1	metabotropic glutamate receptor, phospholipase C activating pathway	protein binding	integral to plasma membrane
			synaptic transmission
213854_at	synaptogyrin 1	SYNGR1			integral to plasma membrane
					membrane
					synapse
					integral to membrane
213869_x_at	Thy-1 cell surface antigen	THY1	angiogenesis	Rho GTPase activator activity	cytosol
			negative regulation of protein kinase activity	integrin binding	plasma membrane
			cytoskeleton organization and biogenesis	protein binding	integral to plasma membrane
			cell-cell adhesion	GPI anchor binding	external side of plasma membrane
			negative regulation of cell migration	GPI anchor binding	growth cone
			negative regulation of apoptosis		lipid raft
			positive regulation of GTPase activity		lipid raft
			mast cell activation		membrane
			retinal cone cell development		plasma membrane
			focal adhesion formation
			negative regulation of fibroblast proliferation
			positive regulation of peptidyl-tyrosine phosphorylation
			negative regulation of axonogenesis
			T cell receptor signaling pathway
			negative regulation of T cell receptor signaling pathway
			positive regulation of T cell activation
			positive regulation of release of sequestered calcium ion into cytosol
214043_at	protein tyrosine phosphatase, receptor type, D	PTPRD	protein amino acid dephosphorylation	receptor activity	integral to plasma membrane	Cell adhesion molecules (CAMs)	GENMAPP/KEGG
			phosphate metabolism	transmembrane receptor protein tyrosine phosphatase activity	membrane	Adherens junction	GENMAPP/KEGG
			transmembrane receptor protein tyrosine phosphatase signaling pathway	hydrolase activity	integral to membrane	Jak-STAT signaling pathway	GENMAPP/KEGG
			protein amino acid dephosphorylation	phosphoprotein phosphatase activity		T cell receptor signaling pathway	GENMAPP/KEGG
				protein tyrosine phosphatase activity		B cell receptor signaling pathway	GENMAPP/KEGG
						Leukocyte transendothelial migration	GENMAPP/KEGG
						Insulin signaling pathway	GENMAPP/KEGG
						Adipocytokine signaling pathway	GENMAPP/KEGG
						Type I diabetes mellitus	GENMAPP/KEGG
						Epithelial cell signaling in Helicobacter pylori	GENMAPP/KEGG
214111_at	opioid binding protein/cell adhesion molecule-like	OPCML	cell adhesion	opioid receptor activity	plasma membrane
			cell adhesion	protein binding	integral to plasma membrane
			neuron recognition	GPI anchor binding	membrane
					integral to membrane
215116_s_at	dynamin 1	DNM1	endocytosis	nucleotide binding	microtubule
			receptor mediated endocytosis	motor activity	coated pit
			synaptic transmission	GTPase activity
			endocytosis	GTPase activity
				protein binding
				GTP binding
				hydrolase activity
				protein binding
				GTP binding
215310_at	Adenomatosis polyposis coli	APC	protein complex assembly	beta-catenin binding	nucleus	Wnt_signaling	GENMAPP/KEGG
			cell cycle	microtubule binding	lateral plasma membrane	Wnt_signaling	GENMAPP/KEGG
			cell adhesion	protein binding		Wnt_signaling	GENMAPP/KEGG
			signal transduction	binding		Wnt_signaling	GENMAPP/KEGG
			Wnt receptor signaling pathway	protein binding
			negative regulation of progression through cell cycle
			regulation of progression through cell cycle
215403_at	Triple functional domain (PTPRF interacting)	TRIO	protein amino acid phosphorylation	nucleotide binding	intracellular
			transmembrane receptor protein tyrosine phosphatase signaling pathway	protein serine/threonine kinase activity
			regulation of Rho protein signal transduction	protein serine/threonine kinase activity
				Rho guanyl-nucleotide exchange factor activity
				ATP binding
				transferase activity
				protein kinase activity
				guanyl-nucleotide exchange factor activity
				kinase activity
				guanyl-nucleotide exchange factor activity
215406_at	Triple functional domain (PTPRF interacting)	TRIO	protein amino acid phosphorylation	nucleotide binding	intracellular
			transmembrane receptor protein tyrosine phosphatase signaling pathway	protein serine/threonine kinase activity
			regulation of Rho protein signal transduction	protein serine/threonine kinase activity
				Rho guanyl-nucleotide exchange factor activity
				ATP binding
				transferase activity
				protein kinase activity
				guanyl-nucleotide exchange factor activity
				kinase activity
				guanyl-nucleotide exchange factor activity
215483_at	A kinase (PRKA) anchor protein (yotiao) 9	AKAP9	transport	receptor binding	centrosome	G_Protein_Signaling	GENMAPP/KEGG
			signal transduction	protein binding	cytoskeleton	G_Protein_Signaling	GENMAPP/KEGG
			synaptic transmission			G_Protein_Signaling	GENMAPP/KEGG
						G_Protein_Signaling	GENMAPP/KEGG
216096_s_at	neurexin 1	NRXN1	cell adhesion	receptor activity	integral to plasma membrane
			axon guidance	protein binding	membrane
				protein binding	integral to membrane
216137_s_at	Mitogen-activated protein kinase 8 interacting protein 3	MAPK8IP3	vesicle-mediated transport	MAP-kinase scaffold activity	cytoplasm
			regulation of JNK cascade	kinesin binding	membrane
			proteolysis	protein kinase binding
				serine-type peptidase activity
216139_s_at	mitogen-activated protein kinase 8 interacting protein 3	MAPK8IP3	vesicle-mediated transport	MAP-kinase scaffold activity	cytoplasm
			regulation of JNK cascade	kinesin binding	membrane
			proteolysis	protein kinase binding
				serine-type peptidase activity
216234_s_at	protein kinase, cAMP-dependent, catalytic, alpha	PRKACA	protein amino acid phosphorylation	nucleotide binding	nucleus	G_Protein_Signaling	GENMAPP/KEGG
			protein amino acid phosphorylation	protein serine/threonine kinase activity	cAMP-dependent protein kinase complex	G_Protein_Signaling	GENMAPP/KEGG
				cAMP-dependent protein kinase activity		Calcium_regulation_in_cardiac_cells	GENMAPP/KEGG
				protein binding		Calcium_regulation_in_cardiac_cells	GENMAPP/KEGG
				ATP binding		Smooth_muscle_contraction	GENMAPP/KEGG
				transferase activity		Smooth_muscle_contraction	GENMAPP/KEGG
				protein kinase activity
				ATP binding
				kinase activity
216697_at	Triple functional domain (PTPRF interacting)	TRIO	protein amino acid phosphorylation	nucleotide binding	intracellular
			transmembrane receptor protein tyrosine phosphatase signaling pathway	protein serine/threonine kinase activity
			regulation of Rho protein signal transduction	protein serine/threonine kinase activity
				Rho guanyl-nucleotide exchange factor activity
				ATP binding
				transferase activity
				protein kinase activity
				guanyl-nucleotide exchange factor activity
				kinase activity
				guanyl-nucleotide exchange factor activity
216700_at	Triple functional domain (PTPRF interacting)	TRIO	protein amino acid phosphorylation	nucleotide binding	intracellular
			transmembrane receptor protein tyrosine phosphatase signaling pathway	protein serine/threonine kinase activity
			regulation of Rho protein signal transduction	protein serine/threonine kinase activity
				Rho guanyl-nucleotide exchange factor activity
				ATP binding
				transferase activity
				protein kinase activity
				guanyl-nucleotide exchange factor activity
				kinase activity
				guanyl-nucleotide exchange factor activity
216933_x_at	adenomatosis polyposis coli	APC	protein complex assembly	beta-catenin binding	nucleus	Wnt_signaling	GENMAPP/KEGG
			cell cycle	microtubule binding	lateral plasma membrane	Wnt_signaling	GENMAPP/KEGG
			cell adhesion	protein binding		Wnt_signaling	GENMAPP/KEGG
			signal transduction	binding		Wnt_signaling	GENMAPP/KEGG
			Wnt receptor signaling pathway	protein binding
			negative regulation of progression through cell cycle
			regulation of progression through cell cycle
216963_s_at	growth associated protein 43	GAP43	regulation of cell growth	calmodulin binding	membrane
			protein kinase C activation
			nervous system development
			response to wounding
			cell differentiation
			regulation of growth
			development
			nervous system development
216967_at	growth associated protein 43	GAP43	regulation of cell growth	calmodulin binding	membrane
			protein kinase C activation
			nervous system development
			response to wounding
			cell differentiation
			regulation of growth
			development
			nervous system development
217037_at	Solute carrier family 1 (glial high affinity glutamate transporter), member 2	SLC1A2	transport	L-glutamate transporter activity	membrane fraction
			dicarboxylic acid transport	symporter activity	membrane
			synaptic transmission	sodium:dicarboxylate symporter activity	integral to membrane
			L-glutamate transport
217055_x_at	Solute carrier family 1 (glial high affinity glutamate transporter), member 2	SLC1A2	transport	L-glutamate transporter activity	membrane fraction
			dicarboxylic acid transport	symporter activity	membrane
			synaptic transmission	sodium:dicarboxylate symporter activity	integral to membrane
			L-glutamate transport
217077_s_at	gamma-aminobutyric acid (GABA) B receptor, 2	GABBR2	signal transduction	receptor activity	integral to plasma membrane	GPCRDB_Class_C_Metabotropic_glutamate_pheromone	GENMAPP/KEGG
			G-protein coupled receptor protein signaling pathway	GABA-B receptor activity	postsynaptic membrane	GPCRDB_Class_C_Metabotropic_glutamate_pheromone	GENMAPP/KEGG
			negative regulation of adenylate cyclase activity	signal transducer activity	membrane
			synaptic transmission	G-protein coupled receptor activity	integral to membrane
			G-protein coupled receptor protein signaling pathway	GABA-B receptor activity
				metabotropic glutamate, GABA-B-like receptor activity
217086_at	cholinergic receptor, nicotinic, beta 3	CHRNB3	ion transport	nicotinic acetylcholine-activated cation-selective channel activity	nicotinic acetylcholine-gated receptor-channel complex
			signal transduction	ion channel activity	integral to membrane
			synaptic transmission, cholinergic	extracellular ligand-gated ion channel activity	postsynaptic membrane
			transport	channel or pore class transporter activity	membrane
			transport	neurotransmitter receptor activity
				nicotinic acetylcholine-activated cation-selective channel activity
217341_at	dynamin 1	DNM1	endocytosis	nucleotide binding	microtubule
			receptor mediated endocytosis	motor activity	coated pit
			synaptic transmission	GTPase activity
			endocytosis	GTPase activity
				protein binding
				GTP binding
				hydrolase activity
				protein binding
				GTP binding
220116_at	potassium intermediate/small conductance calcium-activated channel, subfamily N, member 2	KCNN2	ion transport	ion channel activity	membrane
			potassium ion transport	calmodulin binding	integral to membrane
			potassium ion transport	calcium-activated potassium channel activity	integral to membrane
			transport	small conductance calcium-activated potassium channel activity
				small conductance calcium-activated potassium channel activity
220846_s_at	Protein kinase C, zeta	PRKCZ	protein amino acid phosphorylation	nucleotide binding	membrane fraction	G_Protein_Signaling	GENMAPP/KEGG
			protein amino acid phosphorylation	protein serine/threonine kinase activity	cytoplasm	Wnt_signaling	GENMAPP/KEGG
			anti-apoptosis	atypical protein kinase C activity	plasma membrane	Calcium_regulation_in_cardiac_cells	GENMAPP/KEGG
			intracellular signaling cascade	protein binding		Smooth_muscle_contraction	GENMAPP/KEGG
			signal transduction	ATP binding
				zinc ion binding
				transferase activity
				diacylglycerol binding
				metal ion binding
				protein kinase activity
				atypical protein kinase C activity
				kinase activity
				protein kinase activity
222020_s_at	neurotrimin	HNT	cell adhesion	protein binding	integral to plasma membrane
			neuron recognition	GPI anchor binding	membrane
			cell adhesion
34846_at	Calcium/calmodulin-dependent protein kinase (CaM kinase) II beta	CAMK2B	protein amino acid phosphorylation	nucleotide binding		Calcium_regulation_in_cardiac_cells	GENMAPP/KEGG
			protein amino acid phosphorylation	protein serine/threonine kinase activity		Smooth_muscle_contraction	GENMAPP/KEGG
			signal transduction	calcium- and calmodulin-dependent protein kinase activity		Calcium signaling pathway	GENMAPP/KEGG
				calmodulin binding		Wnt signaling pathway	GENMAPP/KEGG
				ATP binding		Tight junction	GENMAPP/KEGG
				transferase activity		Long-term potentiation	GENMAPP/KEGG
				protein kinase activity		Olfactory transduction	GENMAPP/KEGG
				kinase activity		GnRH signaling pathway	GENMAPP/KEGG
						Adipocytokine signaling pathway	GENMAPP/KEGG
225482_at	kinesin family member 1A	KIF1A	microtubule-based movement	nucleotide binding	microtubule
			anterograde axon cargo transport	microtubule motor activity	microtubule associated complex
				ATP binding
				motor activity
				motor activity
225491_at	solute carrier family 1 (glial high affinity glutamate transporter), member 2	SLC1A2	transport	L-glutamate transporter activity	membrane fraction
			dicarboxylic acid transport	symporter activity	membrane
			synaptic transmission	sodium:dicarboxylate symporter activity	integral to membrane
			L-glutamate transport
226651_at	homer homolog 1 (Drosophila)	HOMER1	metabotropic glutamate receptor, phospholipase C activating pathway	protein binding	integral to plasma membrane
			synaptic transmission
227449_at	EPH receptor A4	EPHA4	protein amino acid phosphorylation	nucleotide binding	integral to plasma membrane	Calcium signaling pathway	GENMAPP/KEGG
			signal transduction	receptor activity	membrane	Cytokine-cytokine receptor interaction	GENMAPP/KEGG
			transmembrane receptor protein tyrosine kinase signaling pathway	ephrin receptor activity	integral to membrane	Apoptosis	GENMAPP/KEGG
				ATP binding		Dorso-ventral axis formation	GENMAPP/KEGG
				transferase activity		Axon guidance	GENMAPP/KEGG
				protein kinase activity		VEGF signaling pathway	GENMAPP/KEGG
				protein-tyrosine kinase activity		Focal adhesion	GENMAPP/KEGG
				kinase activity		Adherens junction	GENMAPP/KEGG
				transmembrane receptor protein tyrosine kinase activity		Gap junction	GENMAPP/KEGG
						Hematopoietic cell lineage	GENMAPP/KEGG
						Long-term depression	GENMAPP/KEGG
						Regulation of actin cytoskeleton	GENMAPP/KEGG
						Insulin signaling pathway	GENMAPP/KEGG
						GnRH signaling pathway	GENMAPP/KEGG
						Type II diabetes mellitus	GENMAPP/KEGG
						Dentatorubropallidoluysian atrophy (DRPLA)	GENMAPP/KEGG
						Epithelial cell signaling in Helicobacter pylori	GENMAPP/KEGG
						Colorectal cancer	GENMAPP/KEGG
227566_at	neurotrimin	HNT	cell adhesion	protein binding	integral to plasma membrane
			neuron recognition	GPI anchor binding	membrane
			cell adhesion
228547_at	neurexin 1	NRXN1	cell adhesion	receptor activity	integral to plasma membrane
			axon guidance	protein binding	membrane
				protein binding	integral to membrane
228948_at	EPH receptor A4	EPHA4	protein amino acid phosphorylation	nucleotide binding	integral to plasma membrane	Calcium signaling pathway	GENMAPP/KEGG
			signal transduction	receptor activity	membrane	Cytokine-cytokine receptor interaction	GENMAPP/KEGG
			transmembrane receptor protein tyrosine kinase signaling pathway	ephrin receptor activity	integral to membrane	Apoptosis	GENMAPP/KEGG
				ATP binding		Dorso-ventral axis formation	GENMAPP/KEGG
				transferase activity		Axon guidance	GENMAPP/KEGG
				protein kinase activity		VEGF signaling pathway	GENMAPP/KEGG
				protein-tyrosine kinase activity		Focal adhesion	GENMAPP/KEGG
				kinase activity		Adherens junction	GENMAPP/KEGG
				transmembrane receptor protein tyrosine kinase activity		Gap junction	GENMAPP/KEGG
						Hematopoietic cell lineage	GENMAPP/KEGG
						Long-term depression	GENMAPP/KEGG
						Regulation of actin cytoskeleton	GENMAPP/KEGG
						Insulin signaling pathway	GENMAPP/KEGG
						GnRH signaling pathway	GENMAPP/KEGG
						Type II diabetes mellitus	GENMAPP/KEGG
						Dentatorubropallidoluysian atrophy (DRPLA)	GENMAPP/KEGG
						Epithelial cell signaling in Helicobacter pylori	GENMAPP/KEGG
						Colorectal cancer	GENMAPP/KEGG
229374_at	EPH receptor A4	EPHA4	protein amino acid phosphorylation	nucleotide binding	integral to plasma membrane	Calcium signaling pathway	GENMAPP/KEGG
			signal transduction	receptor activity	membrane	Cytokine-cytokine receptor interaction	GENMAPP/KEGG
			transmembrane receptor protein tyrosine kinase signaling pathway	ephrin receptor activity	integral to membrane	Apoptosis	GENMAPP/KEGG
				ATP binding		Dorso-ventral axis formation	GENMAPP/KEGG
				transferase activity		Axon guidance	GENMAPP/KEGG
				protein kinase activity		VEGF signaling pathway	GENMAPP/KEGG
				protein-tyrosine kinase activity		Focal adhesion	GENMAPP/KEGG
				kinase activity		Adherens junction	GENMAPP/KEGG
				transmembrane receptor protein tyrosine kinase activity		Gap junction	GENMAPP/KEGG
						Hematopoietic cell lineage	GENMAPP/KEGG
						Long-term depression	GENMAPP/KEGG
						Regulation of actin cytoskeleton	GENMAPP/KEGG
						Insulin signaling pathway	GENMAPP/KEGG
						GnRH signaling pathway	GENMAPP/KEGG
						Type II diabetes mellitus	GENMAPP/KEGG
						Dentatorubropallidoluysian atrophy (DRPLA)	GENMAPP/KEGG
						Epithelial cell signaling in Helicobacter pylori	GENMAPP/KEGG
						Colorectal cancer	GENMAPP/KEGG
229537_at	LIM domain only 4	LMO4	neural tube closure	transcription factor activity	transcription factor complex
			transcription	transcription factor binding
			regulation of transcription, DNA-dependent	zinc ion binding
			transcription from RNA polymerase II promoter	metal ion binding
				protein binding
230130_at	Slit homolog 2 (Drosophila)	SLIT2	ureteric bud development	follicle stimulating hormone receptor activity	extracellular region
			chemotaxis	receptor binding	extracellular space
			G-protein coupled receptor protein signaling pathway	calcium ion binding	integral to membrane
			nervous system development	protein binding
			mesoderm migration
			sensory perception of smell
			neuron recognition
			motor axon guidance
			glial cell migration
			cell differentiation
			positive regulation of axonogenesis
			induction of negative chemotaxis
			induction of negative chemotaxis
			development
			nervous system development
			axon guidance
230162_s_at	Mitogen-activated protein kinase 8 interacting protein 3	MAPK8IP3	vesicle-mediated transport	MAP-kinase scaffold activity	cytoplasm
			regulation of JNK cascade	kinesin binding	membrane
			proteolysis	protein kinase binding
				serine-type peptidase activity
231334_at	Mitogen-activated protein kinase 8 interacting protein 3	MAPK8IP3	vesicle-mediated transport	MAP-kinase scaffold activity	cytoplasm
			regulation of JNK cascade	kinesin binding	membrane
			proteolysis	protein kinase binding
				serine-type peptidase activity
231403_at	Triple functional domain (PTPRF interacting)	TRIO	protein amino acid phosphorylation	nucleotide binding	intracellular
			transmembrane receptor protein tyrosine phosphatase signaling pathway	protein serine/threonine kinase activity
			regulation of Rho protein signal transduction	protein serine/threonine kinase activity
				Rho guanyl-nucleotide exchange factor activity
				ATP binding
				transferase activity
				protein kinase activity
				guanyl-nucleotide exchange factor activity
				kinase activity
				guanyl-nucleotide exchange factor activity
232085_at	mitogen-activated protein kinase 8 interacting protein 3	MAPK8IP3	vesicle-mediated transport	MAP-kinase scaffold activity	cytoplasm
			regulation of JNK cascade	kinesin binding	membrane
			proteolysis	protein kinase binding
				serine-type peptidase activity
232677_at	Synaptotagmin XI	SYT11	transport	transporter activity	synaptic vesicle
				calcium ion binding	membrane
				metal ion binding	integral to membrane
					synapse
233424_at	Neurexin 1	NRXN1	cell adhesion	receptor activity	integral to plasma membrane
			axon guidance	protein binding	membrane
				protein binding	integral to membrane
233771_at	Triple functional domain (PTPRF interacting)	TRIO	protein amino acid phosphorylation	nucleotide binding	intracellular
			transmembrane receptor protein tyrosine phosphatase signaling pathway	protein serine/threonine kinase activity
			regulation of Rho protein signal transduction	protein serine/threonine kinase activity
				Rho guanyl-nucleotide exchange factor activity
				ATP binding
				transferase activity
				protein kinase activity
				guanyl-nucleotide exchange factor activity
				kinase activity
				guanyl-nucleotide exchange factor activity
233859_at	triple functional domain (PTPRF interacting)	TRIO	protein amino acid phosphorylation	nucleotide binding	intracellular
	chromosome 14 open reading frame 145	C14orf145	transmembrane receptor protein tyrosine phosphatase signaling pathway	protein serine/threonine kinase activity
			regulation of Rho protein signal transduction	protein serine/threonine kinase activity
				Rho guanyl-nucleotide exchange factor activity
				ATP binding
				transferase activity
				protein kinase activity
				guanyl-nucleotide exchange factor activity
				kinase activity
				guanyl-nucleotide exchange factor activity
233961_at	Gamma-aminobutyric acid (GABA) B receptor, 2	GABBR2	signal transduction	receptor activity	integral to plasma membrane	GPCRDB_Class_C_Metabotropic_glutamate_pheromone	GENMAPP/KEGG
			G-protein coupled receptor protein signaling pathway	GABA-B receptor activity	postsynaptic membrane	GPCRDB_Class_C_Metabotropic_glutamate_pheromone	GENMAPP/KEGG
			negative regulation of adenylate cyclase activity	signal transducer activity	membrane
			synaptic transmission	G-protein coupled receptor activity	integral to membrane
			G-protein coupled receptor protein signaling pathway	GABA-B receptor activity
				metabotropic glutamate, GABA-B-like receptor activity
234126_at	Opioid binding protein/cell adhesion molecule-like	OPCML	cell adhesion	opioid receptor activity	plasma membrane
			cell adhesion	protein binding	integral to plasma membrane
			neuron recognition	GPI anchor binding	membrane
					integral to membrane
234904_x_at	ELAV (embryonic lethal, abnormal vision, Drosophila)-like 4 (Hu antigen D)	ELAVL4	mRNA processing	nucleotide binding
			RNA processing	RNA binding
				RNA binding
				mRNA 3'-UTR binding
				nucleic acid binding
235705_at	Triple functional domain (PTPRF interacting)	TRIO	protein amino acid phosphorylation	nucleotide binding	intracellular
			transmembrane receptor protein tyrosine phosphatase signaling pathway	protein serine/threonine kinase activity
			regulation of Rho protein signal transduction	protein serine/threonine kinase activity
				Rho guanyl-nucleotide exchange factor activity
				ATP binding
				transferase activity
				protein kinase activity
				guanyl-nucleotide exchange factor activity
				kinase activity
				guanyl-nucleotide exchange factor activity
236538_at	glutamate receptor, ionotropic, AMPA 2	GRIA2	ion transport	receptor activity	plasma membrane
			signal transduction	ionotropic glutamate receptor activity	membrane
			synaptic transmission	alpha-amino-3-hydroxy-5-methyl-4-isoxazole propionate selective glutamate receptor activity	integral to membrane
			transport	ion channel activity	postsynaptic membrane
				glutamate-gated ion channel activity
				kainate selective glutamate receptor activity
				glutamate receptor activity
237535_x_at	neurexin 1	NRXN1	cell adhesion	receptor activity	integral to plasma membrane
			axon guidance	protein binding	membrane
				protein binding	integral to membrane
238183_at	Protein kinase, cAMP-dependent, regulatory, type I, beta	PRKAR1B	protein amino acid phosphorylation	nucleotide binding	cAMP-dependent protein kinase complex	G_Protein_Signaling	GENMAPP/KEGG
			signal transduction	cAMP-dependent protein kinase regulator activity	cAMP-dependent protein kinase complex	Calcium_regulation_in_cardiac_cells	GENMAPP/KEGG
			protein amino acid phosphorylation	cAMP binding		Smooth_muscle_contraction	GENMAPP/KEGG
				cAMP-dependent protein kinase regulator activity		G_Protein_Signaling	GENMAPP/KEGG
				kinase activity		Calcium_regulation_in_cardiac_cells	GENMAPP/KEGG
						Smooth_muscle_contraction	GENMAPP/KEGG
238671_at	EPH receptor A4	EPHA4	protein amino acid phosphorylation	nucleotide binding	integral to plasma membrane	Calcium signaling pathway	GENMAPP/KEGG
			signal transduction	receptor activity	membrane	Cytokine-cytokine receptor interaction	GENMAPP/KEGG
			transmembrane receptor protein tyrosine kinase signaling pathway	ephrin receptor activity	integral to membrane	Apoptosis	GENMAPP/KEGG
				ATP binding		Dorso-ventral axis formation	GENMAPP/KEGG
				transferase activity		Axon guidance	GENMAPP/KEGG
				protein kinase activity		VEGF signaling pathway	GENMAPP/KEGG
				protein-tyrosine kinase activity		Focal adhesion	GENMAPP/KEGG
				kinase activity		Adherens junction	GENMAPP/KEGG
				transmembrane receptor protein tyrosine kinase activity		Gap junction	GENMAPP/KEGG
						Hematopoietic cell lineage	GENMAPP/KEGG
						Long-term depression	GENMAPP/KEGG
						Regulation of actin cytoskeleton	GENMAPP/KEGG
						Insulin signaling pathway	GENMAPP/KEGG
						GnRH signaling pathway	GENMAPP/KEGG
						Type II diabetes mellitus	GENMAPP/KEGG
						Dentatorubropallidoluysian atrophy (DRPLA)	GENMAPP/KEGG
						Epithelial cell signaling in Helicobacter pylori	GENMAPP/KEGG
						Colorectal cancer	GENMAPP/KEGG
239476_at	Phosphoinositide-3-kinase, regulatory subunit 1 (p85 alpha)	PIK3R1	intracellular signaling cascade	insulin receptor binding	intracellular
			intracellular signaling cascade	insulin-like growth factor receptor binding	phosphoinositide 3-kinase complex
			insulin receptor signaling pathway	phosphatidylinositol binding	phosphoinositide 3-kinase complex, class IA
			phosphoinositide phosphorylation	kinase activity
			insulin-like growth factor receptor signaling pathway	protein phosphatase binding
			signal transduction	phosphoinositide 3-kinase regulator activity
				phosphoinositide 3-kinase regulator activity
				ErbB-3 class receptor binding
				insulin binding
				insulin receptor substrate binding
				protein binding
239479_x_at	Cholinergic receptor, muscarinic 3	CHRM3	protein modification	rhodopsin-like receptor activity	plasma membrane	GPCRDB_Class_A_Rhodopsin-like	GENMAPP/KEGG
			signal transduction	phosphoinositide phospholipase C activity	integral to plasma membrane	GPCRDB_Other	GENMAPP/KEGG
			signal transduction	receptor activity	integral to membrane	Monoamine_GPCRs	GENMAPP/KEGG
			G-protein coupled receptor protein signaling pathway	receptor activity	postsynaptic membrane	Calcium_regulation_in_cardiac_cells	GENMAPP/KEGG
			G-protein coupled receptor protein signaling pathway	muscarinic acetylcholine receptor activity	membrane	GPCRDB_Class_A_Rhodopsin-like	GENMAPP/KEGG
			nervous system development	muscarinic acetylcholine receptor activity		GPCRDB_Other	GENMAPP/KEGG
			cell proliferation	signal transducer activity		Monoamine_GPCRs	GENMAPP/KEGG
				G-protein coupled receptor activity		Calcium_regulation_in_cardiac_cells	GENMAPP/KEGG
240399_at	Triple functional domain (PTPRF interacting)	TRIO	protein amino acid phosphorylation	nucleotide binding	intracellular
			transmembrane receptor protein tyrosine phosphatase signaling pathway	protein serine/threonine kinase activity
			regulation of Rho protein signal transduction	protein serine/threonine kinase activity
				Rho guanyl-nucleotide exchange factor activity
				ATP binding
				transferase activity
				protein kinase activity
				guanyl-nucleotide exchange factor activity
				kinase activity
				guanyl-nucleotide exchange factor activity
240524_x_at	Protein kinase C, zeta	PRKCZ	protein amino acid phosphorylation	nucleotide binding	membrane fraction	G_Protein_Signaling	GENMAPP/KEGG
			protein amino acid phosphorylation	protein serine/threonine kinase activity	cytoplasm	Wnt_signaling	GENMAPP/KEGG
			anti-apoptosis	atypical protein kinase C activity	plasma membrane	Calcium_regulation_in_cardiac_cells	GENMAPP/KEGG
			intracellular signaling cascade	protein binding		Smooth_muscle_contraction	GENMAPP/KEGG
			signal transduction	ATP binding
				zinc ion binding
				transferase activity
				diacylglycerol binding
				metal ion binding
				protein kinase activity
				atypical protein kinase C activity
				kinase activity
				protein kinase activity
240773_at	Triple functional domain (PTPRF interacting)	TRIO	protein amino acid phosphorylation	nucleotide binding	intracellular
			transmembrane receptor protein tyrosine phosphatase signaling pathway	protein serine/threonine kinase activity
			regulation of Rho protein signal transduction	protein serine/threonine kinase activity
				Rho guanyl-nucleotide exchange factor activity
				ATP binding
				transferase activity
				protein kinase activity
				guanyl-nucleotide exchange factor activity
				kinase activity
				guanyl-nucleotide exchange factor activity
240880_at	Neurexin 1	NRXN1	cell adhesion	receptor activity	integral to plasma membrane
			axon guidance	protein binding	membrane
				protein binding	integral to membrane
241038_at	Cholinergic receptor, muscarinic 3	CHRM3	protein modification	rhodopsin-like receptor activity	plasma membrane	GPCRDB_Class_A_Rhodopsin-like	GENMAPP/KEGG
			signal transduction	phosphoinositide phospholipase C activity	integral to plasma membrane	GPCRDB_Other	GENMAPP/KEGG
			signal transduction	receptor activity	integral to membrane	Monoamine_GPCRs	GENMAPP/KEGG
			G-protein coupled receptor protein signaling pathway	receptor activity	postsynaptic membrane	Calcium_regulation_in_cardiac_cells	GENMAPP/KEGG
			G-protein coupled receptor protein signaling pathway	muscarinic acetylcholine receptor activity	membrane	GPCRDB_Class_A_Rhodopsin-like	GENMAPP/KEGG
			nervous system development	muscarinic acetylcholine receptor activity		GPCRDB_Other	GENMAPP/KEGG
			cell proliferation	signal transducer activity		Monoamine_GPCRs	GENMAPP/KEGG
				G-protein coupled receptor activity		Calcium_regulation_in_cardiac_cells	GENMAPP/KEGG
241079_at	Pumilio homolog 1 (Drosophila)	PUM1	regulation of translation	RNA binding
			regulation of protein biosynthesis	binding
241172_at	glutamate receptor, ionotropic, AMPA 2	GRIA2	ion transport	receptor activity	plasma membrane
			signal transduction	ionotropic glutamate receptor activity	membrane
			synaptic transmission	alpha-amino-3-hydroxy-5-methyl-4-isoxazole propionate selective glutamate receptor activity	integral to membrane
			transport	ion channel activity	postsynaptic membrane
				glutamate-gated ion channel activity
				kainate selective glutamate receptor activity
				glutamate receptor activity
241424_at	ELAV (embryonic lethal, abnormal vision, Drosophila)-like 4 (Hu antigen D)	ELAVL4	mRNA processing	nucleotide binding
			RNA processing	RNA binding
				RNA binding
				mRNA 3'-UTR binding
				nucleic acid binding
241432_at	Slit homolog 2 (Drosophila)	SLIT2	ureteric bud development	follicle stimulating hormone receptor activity	extracellular region
			chemotaxis	receptor binding	extracellular space
			G-protein coupled receptor protein signaling pathway	calcium ion binding	integral to membrane
			nervous system development	protein binding
			mesoderm migration
			sensory perception of smell
			neuron recognition
			motor axon guidance
			glial cell migration
			cell differentiation
			positive regulation of axonogenesis
			induction of negative chemotaxis
			induction of negative chemotaxis
			development
			nervous system development
			axon guidance
242189_at	Homer homolog 1 (Drosophila)	HOMER1	metabotropic glutamate receptor, phospholipase C activating pathway	protein binding	integral to plasma membrane
			synaptic transmission
242493_at	protein tyrosine phosphatase, receptor type, D	PTPRD	protein amino acid dephosphorylation	receptor activity	integral to plasma membrane	Cell adhesion molecules (CAMs)	GENMAPP/KEGG
			phosphate metabolism	transmembrane receptor protein tyrosine phosphatase activity	membrane	Adherens junction	GENMAPP/KEGG
			transmembrane receptor protein tyrosine phosphatase signaling pathway	hydrolase activity	integral to membrane	Jak-STAT signaling pathway	GENMAPP/KEGG
			protein amino acid dephosphorylation	phosphoprotein phosphatase activity		T cell receptor signaling pathway	GENMAPP/KEGG
				protein tyrosine phosphatase activity		B cell receptor signaling pathway	GENMAPP/KEGG
						Leukocyte transendothelial migration	GENMAPP/KEGG
						Insulin signaling pathway	GENMAPP/KEGG
						Adipocytokine signaling pathway	GENMAPP/KEGG
						Type I diabetes mellitus	GENMAPP/KEGG
						Epithelial cell signaling in Helicobacter pylori	GENMAPP/KEGG
243398_at	Neurexin 2	NRXN2	cell adhesion	protein binding	membrane
					integral to membrane
244118_at	gamma-aminobutyric acid (GABA) A receptor, alpha 1	GABRA1	ion transport	GABA-A receptor activity	integral to plasma membrane
			chloride transport	ion channel activity	postsynaptic membrane
			gamma-aminobutyric acid signaling pathway	extracellular ligand-gated ion channel activity	membrane
			transport	chloride channel activity	integral to membrane
			gamma-aminobutyric acid signaling pathway	neurotransmitter receptor activity
			transport	chloride ion binding
				GABA-A receptor activity
				receptor activity
244130_at	5-hydroxytryptamine (serotonin) receptor 2A	HTR2A	signal transduction	rhodopsin-like receptor activity	integral to plasma membrane	GPCRDB_Class_A_Rhodopsin-like	GENMAPP/KEGG
			serotonin receptor signaling pathway	receptor activity	membrane	Monoamine_GPCRs	GENMAPP/KEGG
			synaptic transmission	serotonin receptor activity	integral to membrane
			G-protein coupled receptor protein signaling pathway	signal transducer activity
				G-protein coupled receptor activity
244181_at	Phosphoinositide-3-kinase, regulatory subunit 1 (p85 alpha)	PIK3R1	intracellular signaling cascade	insulin receptor binding	intracellular
			intracellular signaling cascade	insulin-like growth factor receptor binding	phosphoinositide 3-kinase complex
			insulin receptor signaling pathway	phosphatidylinositol binding	phosphoinositide 3-kinase complex, class IA
			phosphoinositide phosphorylation	kinase activity
			insulin-like growth factor receptor signaling pathway	protein phosphatase binding
			signal transduction	phosphoinositide 3-kinase regulator activity
				phosphoinositide 3-kinase regulator activity
				ErbB-3 class receptor binding
				insulin binding
				insulin receptor substrate binding
				protein binding
244527_at	Triple functional domain (PTPRF interacting)	TRIO	protein amino acid phosphorylation	nucleotide binding	intracellular
			transmembrane receptor protein tyrosine phosphatase signaling pathway	protein serine/threonine kinase activity
			regulation of Rho protein signal transduction	protein serine/threonine kinase activity
				Rho guanyl-nucleotide exchange factor activity
				ATP binding
				transferase activity
				protein kinase activity
				guanyl-nucleotide exchange factor activity
				kinase activity
				guanyl-nucleotide exchange factor activity
244793_at	Triple functional domain (PTPRF interacting)	TRIO	protein amino acid phosphorylation	nucleotide binding	intracellular
			transmembrane receptor protein tyrosine phosphatase signaling pathway	protein serine/threonine kinase activity
			regulation of Rho protein signal transduction	protein serine/threonine kinase activity
				Rho guanyl-nucleotide exchange factor activity
				ATP binding
				transferase activity
				protein kinase activity
				guanyl-nucleotide exchange factor activity
				kinase activity
				guanyl-nucleotide exchange factor activity
	chemokine (C-X3-C motif) ligand 1	CX3CL1	immune response	chemokine activity	extracellular region
			cell adhesion	protein binding	extracellular space
			cytokine and chemokine mediated signaling pathway	cytokine activity	cell surface
			immune cell chemotaxis	protein binding	membrane
			positive regulation of inflammatory response	chemokine activity	integral to membrane
			leukocyte adhesive activation	receptor binding	extracellular region
			positive regulation of calcium-independent cell-cell adhesion		integral to membrane
			immune response
			defense response

## Sheet: MMSE C v MCI upregulated P0.01 
gene id	GENE ID	GENE NAME	FC	Pvalue	location	family	coding region	polyA sig(5 bases),site(1base)	CPE	G quartet	Pum motif*	AU rich(ARE database)	GENE ID
1131	CHRM3	cholinergic receptor, muscarinic 3	2.315	0.00544001	Plasma Membrane(PSD)	G-protein coupled receptor	780-2552	2748	-	-	-	-	CHRM3
2891	GRIA2 (GluR2)	glutamate receptor, ionotropic, AMPA 2	2.252	0.00185862	Plasma Membrane(PSD)	ion channel	280-2931	none given	4396, TTTTTATATTTATTCCTCAGGTGGAATGGCTATTTTAATATGCCCAGTGTGGATAAAATGTCACATTTCTGTAACTTTTGACTAAAGAGCCTATATTTATCTAGTTAATGAATTTAAAGGATCTATCTTTCCCTTCATAAAATACCTCTTATTTCCATTAAA	1788, TTGGAATGGGATGGTTGG	5073*	-	GRIA2(GluR2)
4900	NRGN	neurogranin (protein kinase C substrate, RC3)	1.924	0.00231531	Cytoplasm	other	237-473	1277-1282	-	-	-	-	NRGN
6506	SLC1A2	solute carrier family 1 (glial high affinity glutamate transporter), member 2	1.908	0.00971982	Plasma Membrane	transporter	284-2008	none given	3455, TTTTTAATGTCTCTACTATCCTTTTTTATTGAATAACGCACAGTATTTTCCTAAGGTTGCTGGGTTTGGGAGTAAGCTTGGGACTTGAATCATTGAGAAATAAA	-	10347*		SLC1A2
2555	GABRA2	gamma-aminobutyric acid (GABA) A receptor, alpha 2	1.9	0.0070462	Plasma membrane(PSD)	cell-surface linked signal transduction	214..1569	none given	-	-	2130**	-	GABRA2
2043	EPHA4	EPH receptor A4	1.854	0.00285262	Plasma Membrane	kinase	43-3003	6318-6323, 6340,6348		-	4388**		EPHA4
3356	HTR2A	5-hydroxytryptamine (serotonin) receptor 2A	1.802	0.0092271	Plasma Membrane	G-protein coupled receptor	135-1550	2841	-	-		-	HTR2A
7070	THY1	Thy-1 cell surface antigen	1.761	0.000126983	Plasma Membrane	other	57-542	(1140-1145)	-	952, TTGGATGAGGAGTGGTTGG	-	-	THY1
9378	NRXN1	neurexin 1	1.728	0.000227644	Plasma Membrane	transporter	808-2136	none given	4706, TTTTATGAAGCACATACAAAAGAAGACAGAGAATGCAATCAGGAAGGAAAGACTTTTTAAAAAATAAAAACAAGTATCTCATGCTCTTGTTTCTCAAAAAAGAAAAACAAAAAACAAAAAACAGGGGCCAATAAA	-	5652***	y	NRXN1
9568	GABBR2	gamma-aminobutyric acid (GABA) B receptor, 2	1.72	0.000128476	Plasma Membrane	G-protein coupled receptor	458-3283	5732-5737,5760-5765,5786	5727, TTTTTAATAAATTGTTGCAAATTTGTTTTTATGAATAAA	-	2130**	-	GABBR2
9456	HOMER1	homer homolog 1 (Drosophila	1.7	0.00107647	Plasma membrane	cell-surface linked signal transduction	1104..2168	4192..4197,4214	3732, TTTTTATGTATGTGTATGTACGTAAATACATACATATTAATTTACATTAGAGTGAAAAATAAA	-		y	HOMER1
816	CAMK2B	calcium/calmodulin-dependent protein kinase (CaM kinase) II beta	1.7	0.000748948	cytoplasm	kinase	205..1833	none given	-	-	-	-	CAMK2B
324	APC	adenomatosis polyposis coli	1.7	0.0087982	Plasma membrane	cell-surface linked signal transduction	58..8589	10702		-		-	APC
8507	ENC1	ectodermal-neural cortex (with BTB-like domain)	1.7	0.00818302	Nucleus	(neurite outgrowth	400..2169	nonegiven		-		y	ENC1
51552	RAB14	RAB14, member RAS oncogene family	1.6	0.00722197	Plasma membrane	transport	184..831	4034-4039?	1438, TTTTTATACCATTTTATCCTTTTCTCTTTAACAGAAAGTAAATATGTATAAAATTTGAAGGAATCGAACTAACAATACATTCTGTGTATATTATTTTAATGAAGAAAATAAA	-		-	RAB14
348	APOE	apolipoprotein E	1.516	0.00956511	Extracellular Space	transporter	84..1037	1155..1160,1180	-	-	-	-	APOE
9890	LPPR4	plasticity related gene 1 (LPPR4),	1.5	0.00585069	Membrane	(axonal outgrowth	107..2398	4946..4951,4972	4457, TTTTTAATGACTTAACAAATTGTACCACATTGTTAAGGACATATAATGATAGACACTAGAACTCAGACCTCTGCATGTATATTTGATAACATGTCTTTTGTAAAACAAAAATTACAAAAAAATTTGTTTACATTCCACTGGTACCTTAATTTAAAATAAA	-	-	-	LPPR4
5295	PIK3R1	phosphoinositide-3-kinase, regulatory subunit, polypeptide 1 (p85 alpha)	1.5	0.00734081	cytoplasm	cell-surface linked signal transduction, kinase	43..2217	6414..6419, 6437	3873, TTTTTATTTCTAAAATATAAGATCTGAGATTGAATATTTTCATTAAA	-		-	PIK3R1
9900	SV2A	synaptic vesicle glycoprotein 2A	1.489	0.0087049	Cytoplasm	transporter	488-2716	4042	-	-	-		SV2A
2596	GAP43	growth associated protein 43	1.478	0.000955202	Plasma Membrane	other	86-802	none given	-	-	-	-	GAP43
6620	SCN1B	sodium channel, voltage-gated, type I, beta	1.467	0.00892205	Plasma Membrane	ion channel	192..848	1486..1491, 1506	-	-	-	-	SCN1B
9915	ARNT2	aryl-hydrocarbon receptor nuclear translocator 2	1.462	0.00224646	Nucleus	transcription regulator	144..1130	1500, 3157,,3517..3522,3541	-	-	-	-	ARNT2
5590	PRKCZ	protein kinase C, zeta	1.447	0.000336062	Cytoplasm	kinase	396..1625	1987..1992,2011	-	-	-	-	PRKCZ
23208	SYT11	synaptotagmin XI	1.4	0.00224646	membrane	transport	254..1549	none given		-	4032*	-	SYT11
9698	PUM1	pumilio homolog 1	1.4	0.00204916	Cytoplasm	mRNA-binding, regulation	114..3674	5379		-	3929**	-	PUM1
547	KIF1A	kinesin family member 1A	1.4	0.00988488	cytoplasm	transport	147..5219	1028, 5591, 8791..8796, 8816	-	-		-	KIF1A
5575	PRKAR1B	protein kinase, cAMP-dependent, regulatory, type I, beta	1.383	0.00425263	Cytoplasm	kinase	107..1252	none given	-	-	-	-	PRKAR1B
1173	AP2M1	adaptor-related protein complex 2, mu 1 subunit	1.364	0.00648034	Cytoplasm	transporter	158..1459	1915..1920,1934	-	-	-	-	AP2M1
5566	PRKACA	protein kinase, cAMP-dependent, catalytic, alpha	1.361	0.00286947	Cytoplasm	kinase	45-2063	8750-8755,8769,8770	-	-	-	-	PRKACA
2554	GABRA1	gamma-aminobutyric acid (GABA) A receptor, alpha 1	1.359	9.10172e-05	Plasma Membrane (PSD)	ion channel	316-1686	3650-3655,3655-3660, 3672	3240, 3464, TTTTTATAAGGAAGTATTAATGGACCTCTTTTATTTAAAGCCCTTACATAGTATACCTACAAATATATTGCTACAGTATAAATGAAATGTAATATTACTCAATAAA	-	2686*	y	GABRA1
9145	SYNGR1	synaptogyrin 1	1.351	0.00137039	Plasma Membrane	transporter	63...764	4402..4407, 4425	-	-	-	-	SYNGR1
8543	LMO4	LIM domain only 4	1.344	0.00625058	Nucleus	other	781-1278	none given	-	-	-	-	LMO4
1759	DNM1	dynamin 1	1.344	0.00592826	Cytoplasm	enzyme	88-2682	3184-3189,3202,3205,3216	-	-		-	DNM1
23162	MAPK8IP3	mitogen-activated protein kinase 8 interacting protein 3	1.301	0.00852569	Cytoplasm	other	121-4131	5604-5609,5624	-	-	-	-	MAPK8IP3
2051	EPHB6	EPH receptor B6	1.3	0.000795817	membrane	cell-surface linked signal transduction, kinase	833..3853	4017..4022,4036 4043	-	-	-	-	EPHB6
6620	SNCB	synuclein, beta	1.3	0.00437868	Cytoplasm,synaptosome, mitochondrion		444..848	1430..1435, 1450	-	-	-	-	SNCB
9478	CABP1	calcium binding protein 1 (calbrain)	1.3	0.00993158	Plasma Membane (PSD)	calcium regulation	68..1180	1582..1587, 1604	-	-	-	-	CABP1
50863	HNT	neurotrimin	1.298	0.00181623	Unknown	other	665-1699	2190-2195,2203,3348-3353,3375	-	-		y	HNT
5789	PTPRD	protein tyrosine phosphatase, receptor type, D	1.296	0.00177682	Plasma Membrane	phosphatase	712..6450	10056..10061,10078	-	-	-	-	PTPRD
9379	NRXN2	neurexin 2	1.285	0.00184898	Plasma Membrane	transporter	512..2512	3534	-	5672,GTGGGGTTGGGTGGGAAGG:5947, GTGGGTGGGTGGGGTGG	-	y	NRXN2
9353	SLIT2	slit homolog 2 (Drosophila)	1.268	0.0011491	Extracellular Space	other	205..4794	none given	4913, TTTTTATTATGAGAATAAA	-	-	-	SLIT2
8941	CDK5R2	cyclin-dependent kinase 5, regulatory subunit 2 (p39)	1.26	0.000372585	Nucleus	other	146..1249	2480	-	-	-	-	CDK5R2
4761	NEUROD2	neurogenic differentiation 2	1.24	0.00790801	Nucleus	transcription regulator	201..1349	2998..3003,3032	-	-	-	y	NEUROD2
7204	TRIO	triple functional domain (PTPRF interacting)	1.234	0.00897139	Plasma Membrane	kinase	7..9300	10207..10212,10227	-	-	-	y	TRIO
4978	OPCML	opioid binding protein/cell adhesion molecule-like	1.214	0.00234308	Plasma Membrane	transmembrane receptor	185..1201	3188..3193,6413,6391..6396,6413	-	-	1558**	-	OPCML
1996	ELAVL4	ELAV (embryonic lethal, abnormal vision, Drosophila)-like 4 (Hu antigen D)	1.2	0.00281569	Nuclues, cytoplasm	mRNA binding, regulation	225..1367	none given	-	-	-	-	ELAVL4
1142	CHRNB3	cholinergic receptor, nicotinic, beta polypeptide 3	1.153	0.00288475	Plasma Membrane	transmembrane receptor	129..1505	none given	-	-	-	-	CHRNB3
10142	AKAP9	A kinase (PRKA) anchor protein (yotiao) 9	1.146	0.00919932	Cytoplasm	other	223..11922	12419..12424,12447	8913, TTTTTATAATATGTGTTTTTCAACATTGTGTGATTCTGGATCAGACTGGGGTCAGGGAATTTATCTTACACACAGTCAGGGATTTGACATAGCATCAGAAGGCCGAGGAGAAGAAAGTGAAAGTGCAACAGATTCCTTTCCAAAGAAAATAAA	-	12110***	y	AKAP9
3781	KCNN2	potassium intermediate/small conductance calcium-activated channel, subfamily N, member 2	1.069	0.00459363	Plasma Membrane	ion channel	444..1139	1431..1436,1453,1457	2438, TTTTTATTCATGCACTTCAAACAAACTTTACTACTACATTATATGATATATAATAAA	-	-	-	KCNN2
								out of 49	12	3	10	9
									24%	6%	20%	18%
											*=UGUAAAUA.8 core-nt motif (Gerber et al, 2006)
											**=TGTACATA
											***=TGTATATA
